# Supplementary material
Source: PubMed Central journal article supplement (PMC5561520)
Supplement: NIHMS847528-supplement-01.pdf [file NIHMS847528-supplement-01.pdf]

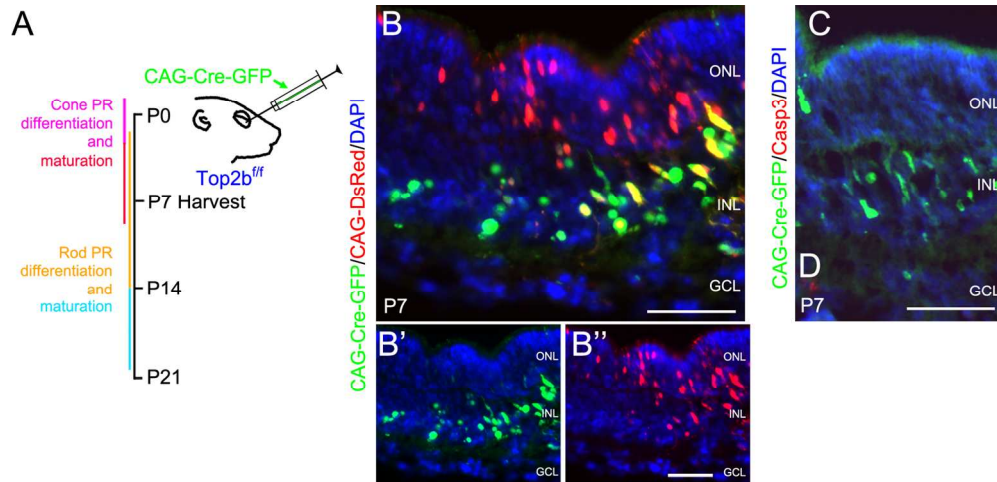

Figure S1. Targeted *Top2b* knockout in mouse retina leads to delayed rod photoreceptor differentiation with dramatic cell death.

*Top2b* knockout in P0 *Top2b<sup>fl/fl</sup>* mouse retina was performed by injection and electroporation of plasmid DNA constructs CAG-Cre-GFP (Cre-mediated knockout) and CAG-DsRed (control) into the sub-retinal space.

(A) a schematic diagram shows the time of injection, retinal tissue harvesting and analysis. (B) the resulting GFP+ rods (*Top2b* knockout) were found mostly in the INL, while the control DsRed+ rods were mostly in the ONL. (C) no significant cell death were detected with the staining of Casp3 in GFP+ or DsRed+ cells. ONL, outer nuclear layer; INL, inner nuclear layer; GCL, ganglion cell layer. Scale bars = 50 $\mu$ m.

147x70mm (300 x 300 DPI)

**Table S1. Summary of RNA sequencing result**

| Library                                                                     | Total reads | Aligned reads | Percent aligned | Transcripts identified | Top2b dependent genes by Cuffdiff * |
|-----------------------------------------------------------------------------|-------------|---------------|-----------------|------------------------|-------------------------------------|
| P0 WT                                                                       | 125,106,508 | 65,664,255    | 52.49%          | 453,454                | 699                                 |
| P0 cKO                                                                      | 132,663,939 | 56,536,313    | 42.62%          | 256,114                |                                     |
| P6 WT                                                                       | 111,640,666 | 54,408,315    | 48.74%          | 443,810                | 180                                 |
| P6 cKO                                                                      | 131,597,614 | 63,531,471    | 48.28%          | 542,898                |                                     |
| * identified as genes with fold change $\geq 1.5$ and p-value $\leq 0.05$ . |             |               |                 |                        |                                     |

Table S2. The Top2b dependent genes (TDGs) at P0.

| test_id     | gene_id     | gene           | locus                    | Ctrl FPKM | cKO FPKM  | log2(fold_change) | p_value     | q_value     | significant |
|-------------|-------------|----------------|--------------------------|-----------|-----------|-------------------|-------------|-------------|-------------|
| XLOC_000050 | XLOC_000050 | Dst            | chr1:34068669-34365497   | 2.49113   | 1.04147   | -1.25818          | 0.000785388 | 0.017607    | yes         |
| XLOC_000074 | XLOC_000074 | D1Bwg0212e     | chr1:39592646-39603722   | 3.151     | 9.59616   | 1.60665           | 0.00171842  | 0.0318985   | yes         |
| XLOC_000090 | XLOC_000090 | Nck2           | chr1:43502595-43627363   | 20.5792   | 3.57751   | -2.52416          | 1.65E-11    | 1.48E-08    | yes         |
| XLOC_000134 | XLOC_000134 | Snord70        | chr1:59741846-59768354   | 4.9748    | 1879.52   | 8.56151           | 1.02E-07    | 2.25E-05    | yes         |
| XLOC_000136 | XLOC_000136 | Bmpr2          | chr1:59820825-59934562   | 10.0632   | 5.23769   | -0.942088         | 0.000897858 | 0.0194886   | yes         |
| XLOC_000147 | XLOC_000147 | Eef1b2,Snora41 | chr1:63190152-63227060   | 47.9518   | 26.3843   | -0.861906         | 0.00248761  | 0.0428583   | yes         |
| XLOC_000152 | XLOC_000152 | Creb1          | chr1:64579377-64651122   | 8.40691   | 4.20372   | -0.999909         | 0.00163987  | 0.0308157   | yes         |
| XLOC_000157 | XLOC_000157 | Mtap2          | chr1:66221902-66489178   | 50.4357   | 20.0169   | -1.33323          | 1.18E-08    | 4.42E-06    | yes         |
| XLOC_000172 | XLOC_000172 | Arcp2          | chr1:74283123-74314787   | 32.3178   | 6.46938   | -2.32063          | 3.25E-07    | 5.54E-05    | yes         |
| XLOC_000228 | XLOC_000228 | Ptma           | chr1:88423310-88427273   | 53.1661   | 10.7684   | -2.30371          | 3.63E-07    | 6.04E-05    | yes         |
| XLOC_000235 | XLOC_000235 | Efh1           | chr1:89160938-89207366   | 0.0495414 | 1.55168   | 4.96905           | 0.000532969 | 0.0129063   | yes         |
| XLOC_000263 | XLOC_000263 | Asb1           | chr1:93437141-93456167   | 4.37612   | 1.43421   | -1.60939          | 0.00097653  | 0.0207938   | yes         |
| XLOC_000285 | XLOC_000285 | Ing5           | chr1:95700541-95718677   | 3.89413   | 1.42718   | -1.44814          | 0.00123633  | 0.0247329   | yes         |
| XLOC_000355 | XLOC_000355 | Ppp1r15b       | chr1:135027742-135036377 | 11.7746   | 4.61389   | -1.35162          | 6.29E-05    | 0.00259598  | yes         |
| XLOC_000370 | XLOC_000370 | Rabif          | chr1:136391236-136404461 | 6.22258   | 0.463353  | -3.74733          | 8.64E-08    | 1.99E-05    | yes         |
| XLOC_000373 | XLOC_000373 | Ube2t          | chr1:136859153-136870714 | 3.68058   | 0.0237325 | -7.27693          | 6.80E-09    | 2.85E-06    | yes         |
| XLOC_000393 | XLOC_000393 | Aspm           | chr1:141351349-141390665 | 4.60249   | 1.81419   | -1.34309          | 0.000273475 | 0.00778722  | yes         |
| XLOC_000403 | XLOC_000403 | Ivns1abp       | chr1:153191627-153211575 | 45.9827   | 17.793    | -1.36978          | 1.78E-09    | 9.18E-07    | yes         |
| XLOC_000439 | XLOC_000439 | Cenpl          | chr1:163001022-163016474 | 6.02698   | 1.13052   | -2.41444          | 2.33E-06    | 0.00022295  | yes         |
| XLOC_000471 | XLOC_000471 | Brp44          | chr1:167391338-167411345 | 0.950646  | 32.1491   | 5.07973           | 2.19E-05    | 0.00118657  | yes         |
| XLOC_000496 | XLOC_000496 | Dedd           | chr1:173259275-173275776 | 4.28894   | 1.18509   | -1.85562          | 0.00293444  | 0.0483551   | yes         |
| XLOC_000510 | XLOC_000510 | Pex19          | chr1:174056885-174066628 | 13.4645   | 5.68196   | -1.2447           | 0.00123792  | 0.024749    | yes         |
| XLOC_000581 | XLOC_000581 | Eprs           | chr1:187186973-187252234 | 17.5237   | 8.97712   | -0.964982         | 0.00139016  | 0.0270689   | yes         |
| XLOC_000591 | XLOC_000591 | 1700022P22Rik  | chr1:192860700-192866820 | 0.0320241 | 7.97297   | 7.95982           | 5.41E-07    | 8.02E-05    | yes         |
| XLOC_000606 | XLOC_000606 | Cd34           | chr1:196765014-196803153 | 2.2058    | 0.0773683 | -4.83342          | 9.88E-05    | 0.00363937  | yes         |
| XLOC_000633 | XLOC_000633 | Rpl7           | chr1:16091356-16094514   | 126.261   | 55.3593   | -1.18951          | 0.00043606  | 0.0111257   | yes         |
| XLOC_000644 | XLOC_000644 | Mcm3           | chr1:20793094-20810294   | 5.9083    | 1.78947   | -1.72321          | 0.000803961 | 0.0179084   | yes         |
| XLOC_000690 | XLOC_000690 | 2010300C02Rik  | chr1:37668520-37776656   | 0.0178308 | 1.87441   | 6.71592           | 8.18E-07    | 0.000106576 | yes         |
| XLOC_000695 | XLOC_000695 | Txndc9         | chr1:38040590-38054125   | 9.32663   | 1.80913   | -2.36606          | 1.19E-05    | 0.000742565 | yes         |
| XLOC_000712 | XLOC_000712 | 1700029F09Rik  | chr1:44143461-44159233   | 3.93017   | 0.776183  | -2.34012          | 0.00268941  | 0.0454049   | yes         |
| XLOC_000745 | XLOC_000745 | Orc2           | chr1:58504476-58561763   | 29.2304   | 6.80505   | -2.10279          | 5.21E-13    | 6.82E-10    | yes         |
| XLOC_000772 | XLOC_000772 | ldh1           | chr1:65205189-65233053   | 39.3568   | 18.0884   | -1.12155          | 0.000177377 | 0.00568362  | yes         |
| XLOC_000810 | XLOC_000810 | Resp18         | chr1:75268776-75274955   | 2.79725   | 0.10218   | -4.77483          | 0.0014256   | 0.027554    | yes         |
| XLOC_000820 | XLOC_000820 | Serpine2       | chr1:79790895-79855240   | 8.69382   | 0.217186  | -5.32298          | 0           | 0           | yes         |
| XLOC_000861 | XLOC_000861 | llkap          | chr1:93272407-93295360   | 28.1063   | 7.44858   | -1.91585          | 0.00043698  | 0.0111402   | yes         |
| XLOC_000894 | XLOC_000894 | Vps4b          | chr1:108666503-108693302 | 26.0196   | 11.3883   | -1.19204          | 0.000116815 | 0.00411778  | yes         |
| XLOC_000948 | XLOC_000948 | Dpp10          | chr1:125228714-125942136 | 2.43167   | 0.0562279 | -5.43452          | 1.76E-05    | 0.00101083  | yes         |
| XLOC_000957 | XLOC_000957 | Dars           | chr1:130260195-130313993 | 28.8428   | 7.28057   | -1.98609          | 4.91E-08    | 1.32E-05    | yes         |
| XLOC_001017 | XLOC_001017 | Cdc73          | chr1:145449801-145549814 | 15.6842   | 5.86364   | -1.41944          | 0.000112149 | 0.00401638  | yes         |
| XLOC_001033 | XLOC_001033 | Smg7           | chr1:154655019-154749776 | 9.2273    | 4.56066   | -1.01667          | 0.00110367  | 0.0228655   | yes         |
| XLOC_001061 | XLOC_001061 | Rabgap1l       | chr1:162149295-162723069 | 8.44695   | 2.78335   | -1.60161          | 4.75E-06    | 0.000371249 | yes         |

|             |             |               |                           |           |           |           |             |             |     |
|-------------|-------------|---------------|---------------------------|-----------|-----------|-----------|-------------|-------------|-----|
| XLOC_001089 | XLOC_001089 | Tipr1         | chr1:167142416-167167089  | 4.5058    | 1.24839   | -1.85171  | 0.00118757  | 0.02411107  | yes |
| XLOC_001100 | XLOC_001100 | Uck2          | chr1:169156216-169215258  | 5.5254    | 23.0564   | 2.06101   | 0.00144709  | 0.0279007   | yes |
| XLOC_001125 | XLOC_001125 | Ufc1          | chr1:173218694-173225113  | 17.9805   | 0.650017  | -4.78981  | 0.00021267  | 0.00639628  | yes |
| XLOC_001160 | XLOC_001160 | Fh1           | chr1:177531508-177555766  | 6.4103    | 1.21761   | -2.39634  | 0.00111181  | 0.023073    | yes |
| XLOC_001174 | XLOC_001174 | Psen2         | chr1:182157134-182186431  | 3.13219   | 0.223956  | -3.80588  | 0.00157656  | 0.0298472   | yes |
| XLOC_001182 | XLOC_001182 | ltpkb         | chr1:182257099-182354253  | 0.0874477 | 2.96917   | 5.08549   | 0.000573455 | 0.013728    | yes |
| XLOC_001188 | XLOC_001188 | Wdr26         | chr1:183103356-183142109  | 28.6639   | 16.0652   | -0.835297 | 0.00188849  | 0.0343761   | yes |
| XLOC_001203 | XLOC_001203 | Mark1         | chr1:186720302-186823428  | 2.7418    | 0.133668  | -4.3584   | 4.07E-10    | 2.61E-07    | yes |
| XLOC_003881 | XLOC_003881 | Fbxo5         | chr10:4541075-4547383     | 10.9971   | 27.6365   | 1.32946   | 0.00178114  | 0.0328298   | yes |
| XLOC_003950 | XLOC_003950 | Epb4.1l2      | chr10:25079603-25243426   | 23.32     | 10.5886   | -1.13905  | 3.56E-05    | 0.00168974  | yes |
| XLOC_003976 | XLOC_003976 | Cdk19         | chr10:40069113-40203624   | 15.9229   | 8.43524   | -0.916605 | 0.00159118  | 0.0300697   | yes |
| XLOC_003993 | XLOC_003993 | Cd24a         | chr10:43298974-43304071   | 14.7332   | 48.7247   | 1.72559   | 7.90E-07    | 0.000103874 | yes |
| XLOC_004014 | XLOC_004014 | Asf1a         | chr10:53257129-53350245   | 10.1333   | 2.83821   | -1.83605  | 0.00214576  | 0.0379472   | yes |
| XLOC_004019 | XLOC_004019 | Fabp7         | chr10:57504686-57508328   | 74.5561   | 36.691    | -1.0229   | 0.000731561 | 0.016605    | yes |
| XLOC_004042 | XLOC_004042 | Npffr1        | chr10:61058231-61089133   | 0.0392726 | 4.67855   | 6.8964    | 1.56E-08    | 5.36E-06    | yes |
| XLOC_004044 | XLOC_004044 | Sar1a         | chr10:61143068-61156045   | 8.667     | 28.5534   | 1.72006   | 8.95E-06    | 0.000595314 | yes |
| XLOC_004112 | XLOC_004112 | Sumo3         | chr10:77068978-77081076   | 3.28092   | 9.73337   | 1.56884   | 0.00292506  | 0.0482819   | yes |
| XLOC_004126 | XLOC_004126 | llvbl         | chr10:78037244-78054709   | 7.74248   | 1.72454   | -2.16658  | 0.000365492 | 0.00971182  | yes |
| XLOC_004189 | XLOC_004189 | Eef2          | chr10:80639375-80645265   | 149.612   | 81.4368   | -0.877478 | 1.18E-05    | 0.000736511 | yes |
| XLOC_004194 | XLOC_004194 | Matk          | chr10:80720289-80725726   | 0.01161   | 2.73684   | 7.88101   | 9.34E-07    | 0.000116832 | yes |
| XLOC_004268 | XLOC_004268 | Kitl          | chr10:99478457-99563046   | 5.53419   | 2.34007   | -1.24182  | 0.00208179  | 0.0371295   | yes |
| XLOC_004330 | XLOC_004330 | Dctn2         | chr10:126703317-126725827 | 38.3916   | 18.9368   | -1.0196   | 0.000683401 | 0.0158314   | yes |
| XLOC_004351 | XLOC_004351 | Atp5b.Mir677  | chr10:127520362-127527603 | 584.037   | 239.131   | -1.28826  | 2.64E-06    | 0.000244629 | yes |
| XLOC_004360 | XLOC_004360 | Cnpy2         | chr10:127759514-127764243 | 22.4612   | 68.8499   | 1.61602   | 0.00080305  | 0.0179008   | yes |
| XLOC_004434 | XLOC_004434 | Vta1          | chr10:14375138-14425295   | 3.42084   | 25.3393   | 2.88895   | 8.93E-06    | 0.000595314 | yes |
| XLOC_004439 | XLOC_004439 | Ccdc28a       | chr10:17933490-17954787   | 3.56573   | 0.104052  | -5.09882  | 0.00032937  | 0.0089816   | yes |
| XLOC_004474 | XLOC_004474 | Ncoa7         | chr10:30365387-30522913   | 7.7557    | 1.42      | -2.44936  | 9.94E-06    | 0.000645225 | yes |
| XLOC_004480 | XLOC_004480 | Clvs2         | chr10:33232139-33344406   | 2.65101   | 0.0623945 | -5.40898  | 5.01E-05    | 0.00218802  | yes |
| XLOC_004527 | XLOC_004527 | D630037F22Rik | chr10:55734099-55948495   | 2.14851   | 0.429729  | -2.32183  | 0.000740888 | 0.0167168   | yes |
| XLOC_004534 | XLOC_004534 | Ccdc109a      | chr10:58911180-59079440   | 5.61124   | 0.0760973 | -6.20433  | 8.16E-06    | 0.000558361 | yes |
| XLOC_004535 | XLOC_004535 | Ddit4         | chr10:59412422-59414518   | 2.90077   | 0.281956  | -3.36289  | 0.000644775 | 0.015079    | yes |
| XLOC_004654 | XLOC_004654 | Plekhj1       | chr10:80258824-80261371   | 7.73653   | 0.710895  | -3.44398  | 0.00194936  | 0.0351466   | yes |
| XLOC_004685 | XLOC_004685 | 1190007I07Rik | chr10:82082595-82085973   | 2.16979   | 0.0486569 | -5.47877  | 0.000124094 | 0.00430668  | yes |
| XLOC_004761 | XLOC_004761 | Syt1          | chr10:107934688-108447675 | 10.5843   | 2.89178   | -1.8719   | 1.97E-05    | 0.00111034  | yes |
| XLOC_004767 | XLOC_004767 | Trhde         | chr10:113835876-114238426 | 2.30648   | 0.054896  | -5.39285  | 7.32E-06    | 0.000513477 | yes |
| XLOC_004788 | XLOC_004788 | Cct2          | chr10:116488053-116500870 | 36.7836   | 9.43466   | -1.96302  | 1.50E-08    | 5.25E-06    | yes |
| XLOC_004808 | XLOC_004808 | Tbc1d30       | chr10:120700875-120748245 | 4.16428   | 29.9071   | 2.84435   | 7.50E-06    | 0.000523518 | yes |
| XLOC_004809 | XLOC_004809 | Rassf3        | chr10:120847406-120913306 | 2.17601   | 0.116916  | -4.21814  | 0.00130817  | 0.0258409   | yes |
| XLOC_004828 | XLOC_004828 | Kif5a         | chr10:126662750-126700419 | 14.8876   | 6.68796   | -1.15448  | 0.00021617  | 0.00648067  | yes |
| XLOC_004852 | XLOC_004852 | Pa2g4         | chr10:127994797-128002990 | 23.4057   | 7.96369   | -1.55535  | 4.03E-07    | 6.51E-05    | yes |
| XLOC_004860 | XLOC_004860 | 1110012D08Rik | chr10:128227965-128241426 | 1.9109    | 0.120025  | -3.99285  | 0.00289064  | 0.048113    | yes |
| XLOC_006895 | XLOC_006895 | Ppia          | chr11:6315838-6319906     | 53.9452   | 4.43371   | -3.60491  | 0           | 0           | yes |
| XLOC_007041 | XLOC_007041 | Skp1a         | chr11:52045496-52060360   | 39.8031   | 14.1006   | -1.49713  | 0.000290661 | 0.00818753  | yes |
| XLOC_007067 | XLOC_007067 | Sap30l        | chr11:57615138-57624117   | 2.3177    | 0.0509715 | -5.50686  | 0.000138635 | 0.004682    | yes |
| XLOC_007110 | XLOC_007110 | Drg2          | chr11:60268118-60282232   | 13.7913   | 1.17984   | -3.5471   | 1.41E-12    | 1.58E-09    | yes |

|             |             |                               |                           |          |           |           |             |             |     |
|-------------|-------------|-------------------------------|---------------------------|----------|-----------|-----------|-------------|-------------|-----|
| XLOC_007129 | XLOC_007129 | Ubb                           | chr11:62365005-62366714   | 127.033  | 25.1804   | -2.33483  | 1.72E-10    | 1.26E-07    | yes |
| XLOC_007133 | XLOC_007133 | Mmg12                         | chr11:62462165-62479861   | 5.31894  | 1.011     | -2.39535  | 0.00177039  | 0.03267     | yes |
| XLOC_007136 | XLOC_007136 | Fam18b                        | chr11:62692991-62708686   | 2.56427  | 17.4467   | 2.76633   | 0.000126954 | 0.00437691  | yes |
| XLOC_007214 | XLOC_007214 | Rnf167                        | chr11:70461090-70465140   | 9.33196  | 2.05118   | -2.18573  | 0.001078    | 0.0224269   | yes |
| XLOC_007233 | XLOC_007233 | Ube2g1                        | chr11:72420762-72499983   | 6.59588  | 1.41938   | -2.2163   | 3.40E-08    | 1.02E-05    | yes |
| XLOC_007333 | XLOC_007333 | Psmd11                        | chr11:80242116-80286341   | 27.3499  | 5.78164   | -2.24199  | 1.63E-11    | 1.48E-08    | yes |
| XLOC_007408 | XLOC_007408 | Car10                         | chr11:92960603-93463065   | 2.17048  | 0.0377684 | -5.84469  | 1.23E-05    | 0.000763109 | yes |
| XLOC_007463 | XLOC_007463 | Rpl19                         | chr11:97888023-97891808   | 56.6698  | 16.3916   | -1.78962  | 6.85E-06    | 0.000490304 | yes |
| XLOC_007569 | XLOC_007569 | Snord104                      | chr11:106362304-106362377 | 1847.18  | 9.3701    | -7.62304  | 0           | 0           | yes |
| XLOC_007579 | XLOC_007579 | Gna13                         | chr11:109224107-10926283  | 3.99809  | 9.04926   | 1.17849   | 0.00131315  | 0.0258543   | yes |
| XLOC_007580 | XLOC_007580 | Amz2                          | chr11:109287259-109299481 | 17.5128  | 6.68283   | -1.38988  | 0.000354887 | 0.00950447  | yes |
| XLOC_007591 | XLOC_007591 | Ttyh2                         | chr11:114536781-114582317 | 10.2328  | 3.8389    | -1.41443  | 0.000526987 | 0.0127813   | yes |
| XLOC_007625 | XLOC_007625 | 1810032O08Rik,Snord1a,Snord1c | chr11:116532973-116537134 | 1505.39  | 53.627    | -4.81103  | 0           | 0           | yes |
| XLOC_007689 | XLOC_007689 | Tug1                          | chr11:3539730-3548811     | 40.2309  | 24.0674   | -0.741224 | 0.000117799 | 0.0041478   | yes |
| XLOC_007696 | XLOC_007696 | Ccdc157                       | chr11:4035162-4060296     | 4.04964  | 1.17363   | -1.78682  | 0.000731704 | 0.016605    | yes |
| XLOC_007723 | XLOC_007723 | H2afv                         | chr11:6327228-6344446     | 50.9116  | 17.8925   | -1.50864  | 2.14E-05    | 0.00116434  | yes |
| XLOC_007742 | XLOC_007742 | Plek                          | chr11:16871208-16908721   | 0.173282 | 3.18526   | 4.20022   | 0.000254455 | 0.00733876  | yes |
| XLOC_007746 | XLOC_007746 | Actr2                         | chr11:19962283-20012954   | 36.142   | 18.112    | -0.996729 | 0.000114367 | 0.00404055  | yes |
| XLOC_007781 | XLOC_007781 | Bod1                          | chr11:31565149-31571862   | 21.4097  | 6.79686   | -1.65532  | 7.40E-05    | 0.00293462  | yes |
| XLOC_007792 | XLOC_007792 | Kcnp1                         | chr11:33529340-33893193   | 6.97687  | 0.554136  | -3.65427  | 5.01E-05    | 0.00218802  | yes |
| XLOC_007796 | XLOC_007796 | Fbl1                          | chr11:35610881-35612386   | 0.152175 | 5.03595   | 5.04846   | 0.000731408 | 0.016605    | yes |
| XLOC_007812 | XLOC_007812 | Lsm11                         | chr11:45741770-45758437   | 0.852255 | 5.00916   | 2.55521   | 5.15E-05    | 0.00223963  | yes |
| XLOC_007813 | XLOC_007813 | Thg1l                         | chr11:45760962-45768996   | 12.605   | 1.57059   | -3.00461  | 0.000904665 | 0.0195936   | yes |
| XLOC_007846 | XLOC_007846 | Hnmpab                        | chr11:51398258-51420383   | 136.407  | 81.9572   | -0.734977 | 0.000266986 | 0.00762317  | yes |
| XLOC_007871 | XLOC_007871 | Cdc42se2                      | chr11:54530916-54601205   | 7.95708  | 22.9328   | 1.5271    | 0.000146789 | 0.00490462  | yes |
| XLOC_007886 | XLOC_007886 | Zfp672                        | chr11:58128575-58136848   | 8.21104  | 0.625426  | -3.71465  | 9.81E-07    | 0.000121255 | yes |
| XLOC_007901 | XLOC_007901 | Rnf187                        | chr11:58745789-58752408   | 6.0952   | 19.9271   | 1.70899   | 0.000320671 | 0.00882369  | yes |
| XLOC_007920 | XLOC_007920 | Sreb1                         | chr11:59918514-60034106   | 13.1764  | 4.53341   | -1.53929  | 0.000208999 | 0.00631203  | yes |
| XLOC_007971 | XLOC_007971 | Chd3                          | chr11:69156774-69182928   | 5.40484  | 1.59879   | -1.75727  | 0.00178242  | 0.0328341   | yes |
| XLOC_007984 | XLOC_007984 | Senp3                         | chr11:69486611-69495586   | 12.4296  | 2.88533   | -2.10698  | 0.000128706 | 0.00440348  | yes |
| XLOC_008014 | XLOC_008014 | Slc25a11                      | chr11:70457698-70460495   | 10.3575  | 3.39227   | -1.61035  | 0.00179755  | 0.0330161   | yes |
| XLOC_008016 | XLOC_008016 | Spag7                         | chr11:70477270-70482918   | 9.0684   | 0.856281  | -3.40469  | 1.15E-05    | 0.000718942 | yes |
| XLOC_008094 | XLOC_008094 | Rpl23a,Snord42b,Snord4a       | chr11:77992267-77997086   | 12478.5  | 1133.27   | -3.46089  | 0           | 0           | yes |
| XLOC_008107 | XLOC_008107 | Wsb1                          | chr11:79052878-79068197   | 40.1075  | 17.5358   | -1.19357  | 2.62E-06    | 0.000243918 | yes |
| XLOC_008111 | XLOC_008111 | Utp6                          | chr11:79747457-79775889   | 8.83018  | 3.16592   | -1.47982  | 0.000321188 | 0.0088258   | yes |
| XLOC_008143 | XLOC_008143 | Pigw                          | chr11:84689814-84729858   | 2.75367  | 0.0973921 | -4.82141  | 0.000212816 | 0.00639628  | yes |
| XLOC_008148 | XLOC_008148 | Ints2                         | chr11:86024184-86071070   | 5.0732   | 1.34076   | -1.91984  | 3.15E-07    | 5.46E-05    | yes |
| XLOC_008149 | XLOC_008149 | Med13                         | chr11:86079216-86171131   | 21.3743  | 12.2578   | -0.80218  | 0.00147607  | 0.0283031   | yes |
| XLOC_008150 | XLOC_008150 | Rps6kb1                       | chr11:86298158-86358309   | 10.0783  | 3.24636   | -1.63435  | 0.000133805 | 0.00455313  | yes |
| XLOC_008234 | XLOC_008234 | Fbxl20                        | chr11:97943867-98010930   | 7.55354  | 2.0558    | -1.87745  | 3.52E-06    | 0.000300047 | yes |
| XLOC_008241 | XLOC_008241 | Med24                         | chr11:98565904-98590749   | 7.75816  | 1.76867   | -2.13305  | 4.90E-05    | 0.00216068  | yes |
| XLOC_008304 | XLOC_008304 | Acly                          | chr11:100337655-100389314 | 42.6523  | 26.4154   | -0.691247 | 0.00264445  | 0.0447746   | yes |
| XLOC_008421 | XLOC_008421 | Nat9                          | chr11:115044145-115048630 | 2.0082   | 0.0886038 | -4.50239  | 0.00107531  | 0.0224269   | yes |
| XLOC_008423 | XLOC_008423 | Fdxr                          | chr11:115129338-115138283 | 2.52893  | 0.0312824 | -6.33703  | 5.67E-06    | 0.000431809 | yes |
| XLOC_008460 | XLOC_008460 | Srsf2                         | chr11:116704828-116714408 | 149.149  | 69.2274   | -1.10734  | 2.10E-05    | 0.00114803  | yes |

|             |             |                 |                           |           |           |           |             |             |     |
|-------------|-------------|-----------------|---------------------------|-----------|-----------|-----------|-------------|-------------|-----|
| XLOC_008490 | XLOC_008490 | Arl16           | chr11:120319442-120328914 | 3.14478   | 0.247913  | -3.66505  | 0.00209462  | 0.0372735   | yes |
| XLOC_008493 | XLOC_008493 | P4hb            | chr11:120421617-120434250 | 9.53825   | 22.5526   | 1.2415    | 0.0011392   | 0.0233232   | yes |
| XLOC_008495 | XLOC_008495 | Thoc4           | chr11:120453788-120459698 | 35.2442   | 123.376   | 1.8076    | 9.10E-09    | 3.66E-06    | yes |
| XLOC_010419 | XLOC_010419 | Rrm2            | chr12:25393118-25399011   | 5.90071   | 1.75156   | -1.75225  | 0.000819225 | 0.0181839   | yes |
| XLOC_010439 | XLOC_010439 | Atxn711         | chr12:33987379-34053142   | 0.378843  | 4.05283   | 3.41925   | 0.00297431  | 0.0487817   | yes |
| XLOC_010469 | XLOC_010469 | Pnpla8          | chr12:45370140-45414422   | 18.4606   | 6.95749   | -1.40781  | 7.68E-05    | 0.00302389  | yes |
| XLOC_010498 | XLOC_010498 | Lrfn5           | chr12:62625618-62946245   | 3.30728   | 0.0701384 | -5.5593   | 1.22E-05    | 0.000757568 | yes |
| XLOC_010501 | XLOC_010501 | Prpf39          | chr12:66137320-66174925   | 55.3955   | 16.6908   | -1.73072  | 4.20E-10    | 2.64E-07    | yes |
| XLOC_010508 | XLOC_010508 | Klhdc2          | chr12:70397667-70458153   | 57.4277   | 27.1432   | -1.08115  | 5.83E-05    | 0.00246899  | yes |
| XLOC_010528 | XLOC_010528 | Mnat1           | chr12:74224703-74374975   | 3.5077    | 0.176462  | -4.31309  | 0.000505994 | 0.0124061   | yes |
| XLOC_010531 | XLOC_010531 | Hif1a           | chr12:75008853-75048517   | 68.0816   | 39.9002   | -0.770869 | 5.89E-05    | 0.00248684  | yes |
| XLOC_010564 | XLOC_010564 | Ttc9            | chr12:82732355-82768564   | 10.1398   | 2.83238   | -1.83995  | 0.00187767  | 0.0342076   | yes |
| XLOC_010581 | XLOC_010581 | Zfp410          | chr12:85658079-85684674   | 12.6724   | 3.77874   | -1.74571  | 0.000183283 | 0.00577966  | yes |
| XLOC_010586 | XLOC_010586 | Vsx2            | chr12:85910801-85936407   | 11.491    | 26.7568   | 1.21941   | 0.00048617  | 0.012101    | yes |
| XLOC_010619 | XLOC_010619 | Adck1           | chr12:89599244-89700162   | 3.29719   | 0.26879   | -3.61669  | 0.000884714 | 0.0192431   | yes |
| XLOC_010671 | XLOC_010671 | Ccnk            | chr12:109417947-109441705 | 4.71428   | 0.396474  | -3.57174  | 0.000882917 | 0.0192174   | yes |
| XLOC_010770 | XLOC_010770 | Crip2           | chr12:114378446-114383717 | 8.60843   | 25.9918   | 1.59424   | 0.00296489  | 0.0486527   | yes |
| XLOC_010805 | XLOC_010805 | Tubb2a-ps2      | chr12:11887801-11889705   | 73.7142   | 33.6474   | -1.13145  | 0.000188615 | 0.00592995  | yes |
| XLOC_010807 | XLOC_010807 | Ddx1            | chr12:13226112-13256051   | 13.0294   | 5.6773    | -1.19849  | 0.00172182  | 0.0319401   | yes |
| XLOC_010835 | XLOC_010835 | Bcap29          | chr12:32280218-32319523   | 9.88437   | 1.20706   | -3.03365  | 0.000745281 | 0.0167918   | yes |
| XLOC_010870 | XLOC_010870 | Cfl2            | chr12:55959799-55963864   | 23.5897   | 11.9365   | -0.982781 | 0.00256255  | 0.0435994   | yes |
| XLOC_010879 | XLOC_010879 | Slc25a21        | chr12:57813620-58298459   | 0.0272123 | 1.69092   | 5.95741   | 2.89E-05    | 0.00145097  | yes |
| XLOC_010896 | XLOC_010896 | Sdcccag1        | chr12:70397667-70458153   | 25.2842   | 6.53783   | -1.95135  | 1.41E-06    | 0.000158878 | yes |
| XLOC_010903 | XLOC_010903 | Sav1            | chr12:70847834-71087989   | 7.19176   | 1.45456   | -2.30576  | 0.00146534  | 0.0281145   | yes |
| XLOC_010960 | XLOC_010960 | Entpd5          | chr12:85702917-85749979   | 2.97131   | 0.689086  | -2.10834  | 6.18E-05    | 0.00258028  | yes |
| XLOC_010961 | XLOC_010961 | Aldh6a1         | chr12:85750017-85791900   | 5.82856   | 13.6887   | 1.23177   | 0.0029825   | 0.0488651   | yes |
| XLOC_010976 | XLOC_010976 | Angel1          | chr12:88041451-88067410   | 1.21336   | 6.94184   | 2.51631   | 0.000382874 | 0.0100546   | yes |
| XLOC_011065 | XLOC_011065 | Ckb             | chr12:112907277-112910549 | 92.0862   | 264.917   | 1.52448   | 5.71E-08    | 1.48E-05    | yes |
| XLOC_011079 | XLOC_011079 | Brf1            | chr12:114198072-114238871 | 6.84919   | 1.93561   | -1.82315  | 0.000492515 | 0.0121707   | yes |
| XLOC_013307 | XLOC_013307 | Hist1h2bj       | chr13:22135098-22135479   | 65.1669   | 6.91023   | -3.23733  | 0.00155397  | 0.0294907   | yes |
| XLOC_013331 | XLOC_013331 | Hist1h3f        | chr13:23635920-23636923   | 7.81265   | 113.025   | 3.85468   | 5.12E-12    | 5.54E-09    | yes |
| XLOC_013337 | XLOC_013337 | Hist1h2bc       | chr13:23776067-23784349   | 8.41522   | 31.847    | 1.92009   | 0.00238929  | 0.041506    | yes |
| XLOC_013340 | XLOC_013340 | Hist1h2bb       | chr13:23838602-23839070   | 17.0127   | 99.8009   | 2.55244   | 1.26E-05    | 0.000778426 | yes |
| XLOC_013344 | XLOC_013344 | Hist1h1a        | chr13:23855536-23856283   | 59.0542   | 22.5506   | -1.38887  | 0.000470006 | 0.0117597   | yes |
| XLOC_013353 | XLOC_013353 | Tdp2            | chr13:24923527-24934022   | 20.5995   | 8.43284   | -1.28852  | 0.00051797  | 0.0126308   | yes |
| XLOC_013406 | XLOC_013406 | BC024659        | chr13:41345212-41371946   | 8.56065   | 3.66162   | -1.22524  | 0.0018704   | 0.0340948   | yes |
| XLOC_013426 | XLOC_013426 | Id4             | chr13:48356795-48361418   | 8.15897   | 20.6275   | 1.33811   | 0.0015644   | 0.029635    | yes |
| XLOC_013442 | XLOC_013442 | Nxnl2           | chr13:51266393-51270556   | 0.670712  | 10.8016   | 4.00941   | 0.00123105  | 0.0246744   | yes |
| XLOC_013470 | XLOC_013470 | Ddx46           | chr13:55736387-55782640   | 15.0332   | 5.75929   | -1.38419  | 7.14E-05    | 0.00284897  | yes |
| XLOC_013542 | XLOC_013542 | Lysmd3          | chr13:81796804-81811859   | 9.38577   | 2.22879   | -2.07421  | 2.04E-05    | 0.00112615  | yes |
| XLOC_013570 | XLOC_013570 | Mir1940,Snora47 | chr13:96095191-96107796   | 212.061   | 12.7407   | -4.05696  | 2.76E-06    | 0.000248684 | yes |
| XLOC_013583 | XLOC_013583 | Smn1            | chr13:100894809-100907653 | 1.6563    | 13.2925   | 3.00458   | 0.00228556  | 0.0399027   | yes |
| XLOC_013584 | XLOC_013584 | Taf9            | chr13:101421297-101436368 | 72.6874   | 18.135    | -2.00293  | 6.11E-08    | 1.54E-05    | yes |
| XLOC_013588 | XLOC_013588 | Trim23          | chr13:104969177-104993699 | 15.4517   | 3.37465   | -2.19496  | 1.06E-11    | 1.04E-08    | yes |
| XLOC_013618 | XLOC_013618 | Mocs2           | chr13:115608444-115619711 | 15.42     | 5.27711   | -1.54698  | 0.000390134 | 0.0102282   | yes |

|             |             |               |                           |           |            |          |             |             |     |
|-------------|-------------|---------------|---------------------------|-----------|------------|----------|-------------|-------------|-----|
| XLOC_013619 | XLOC_013619 | Emb           | chr13:118009379-118063222 | 6.14175   | 0.969457   | -2.6634  | 0.00154611  | 0.0293593   | yes |
| XLOC_013776 | XLOC_013776 | Slc35b3       | chr13:39024008-39052744   | 13.5634   | 4.77537    | -1.50604 | 0.00268635  | 0.0453862   | yes |
| XLOC_013784 | XLOC_013784 | Tbc1d7        | chr13:43247112-43266728   | 3.19736   | 0.00620747 | -9.00866 | 3.51E-08    | 1.02E-05    | yes |
| XLOC_013790 | XLOC_013790 | Nup153        | chr13:46775270-46823218   | 9.09559   | 3.83695    | -1.24521 | 0.000914644 | 0.0196788   | yes |
| XLOC_013820 | XLOC_013820 | 4833439L19Rik | chr13:54605165-54666743   | 17.6765   | 4.03976    | -2.12949 | 1.11E-07    | 2.32E-05    | yes |
| XLOC_013858 | XLOC_013858 | Golm1         | chr13:59736356-59777145   | 7.24162   | 2.2859     | -1.66355 | 0.000271227 | 0.00773723  | yes |
| XLOC_013927 | XLOC_013927 | Adams16       | chr13:70866685-70980688   | 0.291072  | 2.51971    | 3.11381  | 0.00109514  | 0.0227188   | yes |
| XLOC_014014 | XLOC_014014 | Pik3r1        | chr13:102450717-102538172 | 19.7298   | 6.29987    | -1.64699 | 5.94E-09    | 2.59E-06    | yes |
| XLOC_014021 | XLOC_014021 | Cwc27         | chr13:105421406-105607033 | 3.40129   | 0.689646   | -2.30215 | 0.00244972  | 0.0423682   | yes |
| XLOC_015963 | XLOC_015963 | Atxn7         | chr14:14845004-14939815   | 3.01347   | 0.734481   | -2.03663 | 0.00299047  | 0.0489191   | yes |
| XLOC_015969 | XLOC_015969 | Top2b         | chr14:17197719-17263301   | 30.3155   | 2.43687    | -3.63695 | 0           | 0           | yes |
| XLOC_015970 | XLOC_015970 | Thrb          | chr14:18493473-18870602   | 5.52065   | 1.7293     | -1.67465 | 0.000616144 | 0.0145175   | yes |
| XLOC_015977 | XLOC_015977 | Fut11         | chr14:21514189-21520209   | 5.07021   | 1.14153    | -2.15108 | 0.00161999  | 0.030504    | yes |
| XLOC_015978 | XLOC_015978 | Chchd1        | chr14:21521054-21523750   | 40.1569   | 13.5084    | -1.57179 | 0.00241217  | 0.041788    | yes |
| XLOC_015981 | XLOC_015981 | Vcl           | chr14:21748654-21852895   | 2.63919   | 0.676579   | -1.96377 | 0.00140243  | 0.0272403   | yes |
| XLOC_016007 | XLOC_016007 | Erc2          | chr14:28435627-29291723   | 3.38876   | 0.208691   | -4.02132 | 9.60E-06    | 0.000630418 | yes |
| XLOC_016020 | XLOC_016020 | Nek4          | chr14:31764673-31802028   | 4.09605   | 0.503561   | -3.024   | 0.000101416 | 0.00370814  | yes |
| XLOC_016021 | XLOC_016021 | Gltd81        | chr14:31813011-31832275   | 30.7962   | 9.02723    | -1.7704  | 3.09E-07    | 5.39E-05    | yes |
| XLOC_016022 | XLOC_016022 | Pbrm1         | chr14:31832323-31934846   | 21.8532   | 9.50358    | -1.2013  | 5.24E-06    | 0.000404203 | yes |
| XLOC_016071 | XLOC_016071 | Gm1821        | chr14:46703701-46704632   | 39.5777   | 10.8043    | -1.87308 | 0.000133361 | 0.00454789  | yes |
| XLOC_016073 | XLOC_016073 | Cdkn3         | chr14:47380215-47391200   | 6.68173   | 0.362343   | -4.2048  | 0.00145152  | 0.0279524   | yes |
| XLOC_016167 | XLOC_016167 | Mphosph8      | chr14:57287084-57316266   | 2.52034   | 0.507512   | -2.3121  | 0.00291685  | 0.0482819   | yes |
| XLOC_016179 | XLOC_016179 | Fam123a       | chr14:60997122-60999840   | 12.7294   | 3.36857    | -1.91796 | 0.00017593  | 0.00564992  | yes |
| XLOC_016272 | XLOC_016272 | Snora31       | chr14:76245062-76248209   | 184.459   | 33.8352    | -2.4467  | 1.22E-05    | 0.000756571 | yes |
| XLOC_016281 | XLOC_016281 | Mtrf1         | chr14:79797578-79823457   | 3.56868   | 0.0517608  | -6.10739 | 4.26E-06    | 0.000345208 | yes |
| XLOC_016336 | XLOC_016336 | 4930452B06Rik | chr14:9263685-9498804     | 2.14915   | 0.129777   | -4.04967 | 0.00182939  | 0.033503    | yes |
| XLOC_016339 | XLOC_016339 | Cadps         | chr14:13205070-13655695   | 8.15389   | 2.01912    | -2.01376 | 1.09E-06    | 0.000131604 | yes |
| XLOC_016344 | XLOC_016344 | Lrrc3b        | chr14:16190030-16271501   | 2.04201   | 0.032071   | -5.99258 | 3.03E-05    | 0.00149461  | yes |
| XLOC_016352 | XLOC_016352 | 2700060E02Rik | chr14:20570478-20643045   | 20.7397   | 8.59217    | -1.2713  | 0.00283268  | 0.0472987   | yes |
| XLOC_016380 | XLOC_016380 | Ppifos        | chr14:26513655-26520768   | 2.00008   | 0.0287902  | -6.11833 | 1.86E-05    | 0.00106233  | yes |
| XLOC_016404 | XLOC_016404 | Phf7          | chr14:32050881-32064404   | 2.75961   | 0.0976883  | -4.82014 | 0.00031012  | 0.00863167  | yes |
| XLOC_016429 | XLOC_016429 | Gcap14        | chr14:37688101-37781950   | 6.26019   | 1.93536    | -1.6936  | 2.20E-07    | 4.19E-05    | yes |
| XLOC_016463 | XLOC_016463 | 3632451O06Rik | chr14:50300912-50403056   | 7.83461   | 2.27353    | -1.78493 | 0.00122665  | 0.0246177   | yes |
| XLOC_016511 | XLOC_016511 | Dad1          | chr14:54855159-54873604   | 8.2072    | 0.618569   | -3.72988 | 0.0016459   | 0.0308772   | yes |
| XLOC_016607 | XLOC_016607 | Mtmr9         | chr14:64141197-64162790   | 12.4456   | 5.11587    | -1.28259 | 0.000790362 | 0.017663    | yes |
| XLOC_016697 | XLOC_016697 | Fbxl3         | chr14:103479379-103498726 | 14.113    | 6.2165     | -1.18285 | 0.0012526   | 0.0250073   | yes |
| XLOC_016713 | XLOC_016713 | Stk24         | chr14:121683413-121778452 | 16.2543   | 6.71835    | -1.27465 | 0.000202396 | 0.00622006  | yes |
| XLOC_016723 | XLOC_016723 | Tmtc4         | chr14:123318196-123382483 | 4.18024   | 0.953406   | -2.13242 | 0.00267978  | 0.0452995   | yes |
| XLOC_019007 | XLOC_019007 | Dap           | chr15:31154139-31204093   | 0.0256903 | 3.02494    | 6.87954  | 1.04E-06    | 0.000126225 | yes |
| XLOC_019014 | XLOC_019014 | Mtdh          | chr15:34012473-34073355   | 20.0555   | 8.62273    | -1.21779 | 3.48E-05    | 0.00166689  | yes |
| XLOC_019069 | XLOC_019069 | Phf201        | chr15:66409133-66476909   | 13.2787   | 5.28006    | -1.33049 | 0.00041063  | 0.0106324   | yes |
| XLOC_019094 | XLOC_019094 | Grina         | chr15:76077236-76080334   | 6.73558   | 19.5786    | 1.5394   | 0.00257057  | 0.0437122   | yes |
| XLOC_019101 | XLOC_019101 | Brp16         | chr15:76199327-76201841   | 2.55218   | 0.00855545 | -8.22067 | 1.32E-07    | 2.67E-05    | yes |
| XLOC_019115 | XLOC_019115 | 1110038F14Rik | chr15:76778973-76781161   | 3.4639    | 0.00510111 | -9.40737 | 4.41E-09    | 1.98E-06    | yes |
| XLOC_019148 | XLOC_019148 | Tab1          | chr15:79963583-79992132   | 2.45376   | 8.32689    | 1.76278  | 0.00209982  | 0.0373232   | yes |

|             |             |               |                           |            |           |          |             |             |     |
|-------------|-------------|---------------|---------------------------|------------|-----------|----------|-------------|-------------|-----|
| XLOC_019165 | XLOC_019165 | Tef           | chr15:81633102-81657299   | 10.5688    | 5.05334   | -1.0645  | 0.000943746 | 0.0202      | yes |
| XLOC_019167 | XLOC_019167 | Csdc2         | chr15:81767188-81781371   | 1.64997    | 6.88989   | 2.06204  | 0.00112347  | 0.0231687   | yes |
| XLOC_019169 | XLOC_019169 | Xrcc6         | chr15:81846798-81870514   | 1.95658    | 0.0584664 | -5.06458 | 0.000352065 | 0.00947528  | yes |
| XLOC_019172 | XLOC_019172 | Ccdc134       | chr15:81958351-81972632   | 4.6972     | 0.364444  | -3.68803 | 0.000256562 | 0.00739276  | yes |
| XLOC_019184 | XLOC_019184 | Tspo          | chr15:83394002-83404633   | 0.0178557  | 2.17093   | 6.92579  | 3.72E-05    | 0.00175015  | yes |
| XLOC_019247 | XLOC_019247 | Tuba1c        | chr15:98860321-98868536   | 18.9946    | 5.96957   | -1.66989 | 6.59E-06    | 0.00047659  | yes |
| XLOC_019263 | XLOC_019263 | Dip2b         | chr15:99869094-100049911  | 6.01266    | 2.90316   | -1.05038 | 0.00188911  | 0.0343761   | yes |
| XLOC_019316 | XLOC_019316 | Pde1b         | chr15:103333728-103360569 | 14.1766    | 4.86787   | -1.54215 | 2.00E-05    | 0.00112058  | yes |
| XLOC_019425 | XLOC_019425 | Mrpl13        | chr15:55365649-55388867   | 11.3616    | 0.342983  | -5.04988 | 6.72E-05    | 0.00273684  | yes |
| XLOC_019430 | XLOC_019430 | 9130401M01Rik | chr15:57853826-57865849   | 2.28209    | 0.105251  | -4.43845 | 3.30E-05    | 0.00160059  | yes |
| XLOC_019432 | XLOC_019432 | Atad2         | chr15:57925601-57966637   | 5.21494    | 1.92614   | -1.43694 | 0.00121526  | 0.0245475   | yes |
| XLOC_019469 | XLOC_019469 | Ptk2          | chr15:73035534-73253621   | 10.1187    | 3.6763    | -1.4607  | 0.000120934 | 0.00420821  | yes |
| XLOC_019475 | XLOC_019475 | Jrk           | chr15:74534972-74540804   | 8.52239    | 2.75224   | -1.63065 | 0.00072314  | 0.0164664   | yes |
| XLOC_019497 | XLOC_019497 | Eef1d         | chr15:75725229-75739770   | 9.81478    | 2.01077   | -2.28721 | 0.000141569 | 0.00477595  | yes |
| XLOC_019561 | XLOC_019561 | Slc16a8       | chr15:79081310-79085178   | 0.00963093 | 2.25512   | 7.87131  | 1.47E-06    | 0.000164632 | yes |
| XLOC_019584 | XLOC_019584 | Mir1944       | chr15:79908194-79913836   | 302.414    | 5.64802   | -5.74263 | 2.73E-06    | 0.000248096 | yes |
| XLOC_019641 | XLOC_019641 | 2210021J22Rik | chr15:85637401-85642127   | 0.112994   | 3.4019    | 4.91203  | 0.00144222  | 0.0278238   | yes |
| XLOC_019667 | XLOC_019667 | Abcd2         | chr15:90976301-91022514   | 12.4703    | 5.35016   | -1.22084 | 0.000239171 | 0.00700736  | yes |
| XLOC_019677 | XLOC_019677 | Nell2         | chr15:95049880-95359137   | 6.25076    | 0.250616  | -4.64048 | 1.86E-05    | 0.00105969  | yes |
| XLOC_019692 | XLOC_019692 | Senp1         | chr15:97871659-97962878   | 7.32471    | 1.75883   | -2.05816 | 0.00273493  | 0.0458371   | yes |
| XLOC_019718 | XLOC_019718 | Tuba1a        | chr15:98780277-98783932   | 53.1308    | 4.86957   | -3.44768 | 0           | 0           | yes |
| XLOC_019724 | XLOC_019724 | Bcdin3d       | chr15:99300514-99305161   | 2.94042    | 0.0333788 | -6.46094 | 3.06E-07    | 5.37E-05    | yes |
| XLOC_019726 | XLOC_019726 | Racgap1       | chr15:99450926-99482052   | 7.41413    | 19.2571   | 1.37704  | 0.000341596 | 0.00925698  | yes |
| XLOC_019747 | XLOC_019747 | Slc11a2       | chr15:100218330-100253486 | 0.998444   | 6.57252   | 2.71869  | 5.16E-05    | 0.00223963  | yes |
| XLOC_021257 | XLOC_021257 | Snx29         | chr16:11405740-11755565   | 2.77843    | 0.162912  | -4.09211 | 0.00211042  | 0.0373642   | yes |
| XLOC_021289 | XLOC_021289 | Mapk1         | chr16:16983474-17047546   | 35.4656    | 15.3119   | -1.21177 | 6.35E-06    | 0.000469483 | yes |
| XLOC_021290 | XLOC_021290 | Ypel1         | chr16:17070403-17111314   | 11.5361    | 1.45267   | -2.98937 | 1.38E-06    | 0.000157024 | yes |
| XLOC_021320 | XLOC_021320 | B3gnt5        | chr16:19760326-19772846   | 11.0099    | 4.48582   | -1.29536 | 0.000784823 | 0.0176069   | yes |
| XLOC_021325 | XLOC_021325 | Ap2m1         | chr16:20535576-20544314   | 38.451     | 18.6499   | -1.04385 | 0.00081733  | 0.0181547   | yes |
| XLOC_021334 | XLOC_021334 | Polr2h        | chr16:20717898-20722338   | 7.05536    | 0.0143327 | -8.94327 | 1.13E-08    | 4.38E-06    | yes |
| XLOC_021339 | XLOC_021339 | Senp2         | chr16:22009556-22049342   | 11.2926    | 5.17756   | -1.12504 | 0.00194495  | 0.0350872   | yes |
| XLOC_021370 | XLOC_021370 | Wdr53         | chr16:32247312-32257169   | 6.49414    | 0.644479  | -3.33293 | 0.00306571  | 0.0497612   | yes |
| XLOC_021373 | XLOC_021373 | Ubxn7         | chr16:32332337-32393833   | 6.86181    | 15.3283   | 1.15954  | 9.79E-05    | 0.00361781  | yes |
| XLOC_021435 | XLOC_021435 | Naa50         | chr16:44139921-44163477   | 10.6295    | 3.83726   | -1.46992 | 7.15E-06    | 0.000507985 | yes |
| XLOC_021465 | XLOC_021465 | Tom70a        | chr16:57121826-57154643   | 9.31885    | 21.2591   | 1.18986  | 0.000453315 | 0.0114728   | yes |
| XLOC_021469 | XLOC_021469 | Cldnd1        | chr16:58728156-58734350   | 13.0142    | 4.10909   | -1.66319 | 0.000274976 | 0.00782287  | yes |
| XLOC_021478 | XLOC_021478 | Cggbp1        | chr16:64851910-64859317   | 10.086     | 2.66037   | -1.92266 | 3.52E-07    | 5.88E-05    | yes |
| XLOC_021491 | XLOC_021491 | Ncam2         | chr16:81200941-81625315   | 4.39995    | 0.552565  | -2.99327 | 0.000382841 | 0.0100546   | yes |
| XLOC_021493 | XLOC_021493 | Jam2          | chr16:84774367-84823129   | 5.54648    | 0.502141  | -3.46541 | 0.00161049  | 0.0303797   | yes |
| XLOC_021597 | XLOC_021597 | 2310008H04Rik | chr16:15887378-16146926   | 4.30459    | 0.432542  | -3.31496 | 0.000493502 | 0.0121789   | yes |
| XLOC_021626 | XLOC_021626 | D16H22S680E   | chr16:18300917-18344025   | 3.22236    | 0.0502829 | -6.00191 | 7.63E-06    | 0.00052854  | yes |
| XLOC_021659 | XLOC_021659 | Tra2b         | chr16:22245813-22266002   | 17.7076    | 6.68307   | -1.40579 | 0.000393734 | 0.0103139   | yes |
| XLOC_021662 | XLOC_021662 | Crygs         | chr16:22805275-22811483   | 0.345307   | 22.3733   | 6.01775  | 2.76E-06    | 0.000248684 | yes |
| XLOC_021667 | XLOC_021667 | Sst           | chr16:23889666-23890930   | 0.0244871  | 5.578     | 7.83158  | 3.38E-07    | 5.73E-05    | yes |
| XLOC_021754 | XLOC_021754 | Gtpbp8        | chr16:44738991-44746476   | 9.25702    | 0.124691  | -6.21412 | 5.10E-08    | 1.36E-05    | yes |



|             |             |               |                         |           |           |           |             |             |     |
|-------------|-------------|---------------|-------------------------|-----------|-----------|-----------|-------------|-------------|-----|
| XLOC_021765 | XLOC_021765 | Pvrl3         | chr16:46395117-46497080 | 26.9523   | 13.1746   | -1.03265  | 0.000937726 | 0.0200901   | yes |
| XLOC_021768 | XLOC_021768 | Dzip3         | chr16:48924325-48994225 | 41.191    | 19.9692   | -1.04455  | 1.44E-05    | 0.000869    | yes |
| XLOC_021826 | XLOC_021826 | Arl6          | chr16:59613146-59639165 | 11.2126   | 2.83229   | -1.98508  | 0.00161861  | 0.0304963   | yes |
| XLOC_021855 | XLOC_021855 | Cct8          | chr16:87455229-87496114 | 56.412    | 32.739    | -0.784995 | 0.00223978  | 0.0394101   | yes |
| XLOC_021919 | XLOC_021919 | A630089N07Rik | chr16:98283676-98303604 | 4.23421   | 0.657524  | -2.68698  | 0.00300398  | 0.0490634   | yes |
| XLOC_023723 | XLOC_023723 | Dynl1f        | chr17:6806387-6814337   | 17.0886   | 6.07362   | -1.49241  | 0.000170634 | 0.0055075   | yes |
| XLOC_023755 | XLOC_023755 | Mllt4         | chr17:13853442-14042801 | 4.05036   | 1.69467   | -1.25704  | 0.00160519  | 0.0302979   | yes |
| XLOC_023797 | XLOC_023797 | Zfp160        | chr17:21145904-21165820 | 8.09042   | 2.35592   | -1.77993  | 0.000350526 | 0.00944195  | yes |
| XLOC_023859 | XLOC_023859 | O610007P22Rik | chr17:25377114-25393309 | 5.27486   | 22.184    | 2.07231   | 0.00167703  | 0.0312694   | yes |
| XLOC_023913 | XLOC_023913 | Brpf3         | chr17:28938070-28975734 | 1.06491   | 4.08715   | 1.94036   | 0.00189406  | 0.0344463   | yes |
| XLOC_023916 | XLOC_023916 | Srsf3         | chr17:29169604-29180786 | 111.183   | 63.4906   | -0.808322 | 0.000329432 | 0.0089816   | yes |
| XLOC_023936 | XLOC_023936 | Cryaa         | chr17:31814889-31818669 | 5.88857   | 21.6565   | 1.87881   | 0.00272007  | 0.04571     | yes |
| XLOC_024014 | XLOC_024014 | Bat1a         | chr17:35378690-35390652 | 26.9411   | 100.903   | 1.90509   | 7.88E-14    | 1.13E-10    | yes |
| XLOC_024096 | XLOC_024096 | Enpp5         | chr17:44215794-44223510 | 17.1952   | 4.73213   | -1.86145  | 2.03E-06    | 0.000205503 | yes |
| XLOC_024105 | XLOC_024105 | Mrops18a      | chr17:46247952-46265857 | 6.80654   | 0.456502  | -3.89823  | 0.00155655  | 0.0295218   | yes |
| XLOC_024119 | XLOC_024119 | Z310039H08Rik | chr17:46909583-46910356 | 11.9258   | 0.995889  | -3.58196  | 0.00136231  | 0.0267422   | yes |
| XLOC_024130 | XLOC_024130 | Pgc           | chr17:47863790-47871427 | 0.0442159 | 2.52424   | 5.83514   | 5.69E-05    | 0.00242278  | yes |
| XLOC_024157 | XLOC_024157 | Mpnd          | chr17:56148623-56175999 | 17.6514   | 6.76612   | -1.38338  | 0.000154687 | 0.00512489  | yes |
| XLOC_024228 | XLOC_024228 | Eml4          | chr17:83750270-83879699 | 7.62339   | 3.46428   | -1.13788  | 0.0017227   | 0.0319401   | yes |
| XLOC_024237 | XLOC_024237 | Prkce         | chr17:86567124-87057259 | 2.60251   | 0.632347  | -2.04112  | 0.00291674  | 0.0482819   | yes |
| XLOC_024302 | XLOC_024302 | Psmb1         | chr17:15612684-15635240 | 14.4181   | 36.7764   | 1.3509    | 0.00296394  | 0.0486527   | yes |
| XLOC_024360 | XLOC_024360 | Traf7         | chr17:24625727-24664883 | 6.65424   | 1.67825   | -1.98732  | 9.78E-05    | 0.00361781  | yes |
| XLOC_024376 | XLOC_024376 | Hn1l          | chr17:25079414-25097568 | 8.00099   | 1.71518   | -2.22182  | 1.40E-06    | 0.000158067 | yes |
| XLOC_024391 | XLOC_024391 | Metrn         | chr17:25931380-25933990 | 41.9027   | 81.6101   | 0.961703  | 0.00300362  | 0.0490634   | yes |
| XLOC_024441 | XLOC_024441 | Glo1          | chr17:30728170-30749604 | 80.3597   | 34.3419   | -1.2265   | 1.84E-06    | 0.000191849 | yes |
| XLOC_024486 | XLOC_024486 | Ring1         | chr17:34157736-34161625 | 7.40673   | 1.058     | -2.8075   | 0.00254151  | 0.0435759   | yes |
| XLOC_024489 | XLOC_024489 | Slc39a7       | chr17:34165210-34168635 | 6.79406   | 20.3961   | 1.58594   | 0.000257472 | 0.00741217  | yes |
| XLOC_024531 | XLOC_024531 | Tubb5         | chr17:35970846-35975246 | 85.3882   | 49.9611   | -0.773232 | 0.00223521  | 0.0393518   | yes |
| XLOC_024533 | XLOC_024533 | Atat1         | chr17:36034540-36047013 | 3.44175   | 0.15173   | -4.50356  | 0.000531806 | 0.0128881   | yes |
| XLOC_024547 | XLOC_024547 | Rpp21         | chr17:36392617-36394791 | 2.82571   | 0.0985433 | -4.84171  | 0.00139877  | 0.0271859   | yes |
| XLOC_024612 | XLOC_024612 | Vegfa         | chr17:46153942-46169326 | 21.2653   | 10.6987   | -0.991067 | 0.00132353  | 0.0260135   | yes |
| XLOC_024637 | XLOC_024637 | Bysl          | chr17:47641999-47748441 | 2.30944   | 0.219276  | -3.39672  | 0.00305571  | 0.0496758   | yes |
| XLOC_024710 | XLOC_024710 | Ndufv2        | chr17:66428047-66450831 | 40.6236   | 2.29387   | -4.14646  | 1.31E-12    | 1.53E-09    | yes |
| XLOC_024732 | XLOC_024732 | Dpy30         | chr17:74698813-74723284 | 39.0606   | 9.05898   | -2.10829  | 0.000994874 | 0.0210625   | yes |
| XLOC_024749 | XLOC_024749 | Srsf7         | chr17:80599423-80606678 | 58.242    | 29.9179   | -0.961053 | 8.67E-06    | 0.000581725 | yes |
| XLOC_024763 | XLOC_024763 | Thada         | chr17:84589395-84865548 | 0.749108  | 2.89798   | 1.9518    | 0.00145588  | 0.0280185   | yes |
| XLOC_024767 | XLOC_024767 | Prepl         | chr17:85427686-85489614 | 26.884    | 10.9568   | -1.29492  | 2.05E-05    | 0.00112913  | yes |
| XLOC_024774 | XLOC_024774 | 4833418N02Rik | chr17:87674225-87682154 | 2.6647    | 0.0190599 | -7.12729  | 8.50E-06    | 0.000574228 | yes |
| XLOC_024782 | XLOC_024782 | Mettl4        | chr17:95126419-95149232 | 3.14767   | 0.410279  | -2.93961  | 7.01E-06    | 0.000500158 | yes |
| XLOC_026419 | XLOC_026419 | Mtpap         | chr18:4375589-4397328   | 14.2003   | 3.23533   | -2.13394  | 0.000533926 | 0.0129195   | yes |
| XLOC_026434 | XLOC_026434 | Rbbp8         | chr18:11816350-11901716 | 6.43815   | 2.18695   | -1.55773  | 0.000596886 | 0.0141808   | yes |
| XLOC_026436 | XLOC_026436 | Riok3         | chr18:12287299-12315876 | 39.196    | 20.8103   | -0.913406 | 0.000212287 | 0.00639263  | yes |
| XLOC_026437 | XLOC_026437 | 3110002H16Rik | chr18:12327238-12394895 | 4.45552   | 0.705589  | -2.65869  | 0.00203501  | 0.0364607   | yes |
| XLOC_026461 | XLOC_026461 | Gaint1        | chr18:24363844-24445317 | 19.4334   | 6.76831   | -1.52167  | 1.68E-06    | 0.000178083 | yes |
| XLOC_026468 | XLOC_026468 | Sap130        | chr18:31794036-31882715 | 1.82109   | 0.196484  | -3.21231  | 0.0029874   | 0.0488944   | yes |

|             |             |               |                         |           |           |           |             |             |     |
|-------------|-------------|---------------|-------------------------|-----------|-----------|-----------|-------------|-------------|-----|
| XLOC_026507 | XLOC_026507 | Wdr55         | chr18:36919871-36925868 | 7.40255   | 0.12855   | -5.84762  | 5.58E-06    | 0.000427166 | yes |
| XLOC_026510 | XLOC_026510 | Vaultrc5      | chr18:36961416-36961761 | 0.0944231 | 2.14598   | 4.50635   | 0.00215337  | 0.0380388   | yes |
| XLOC_026577 | XLOC_026577 | Dmx1          | chr18:49992666-50124739 | 15.1995   | 8.24593   | -0.882272 | 0.000470641 | 0.0117597   | yes |
| XLOC_026593 | XLOC_026593 | Phax          | chr18:56685389-56747366 | 12.3659   | 3.14993   | -1.97297  | 2.35E-05    | 0.00126101  | yes |
| XLOC_026675 | XLOC_026675 | Atp5a1        | chr18:78012506-78021607 | 46.3911   | 23.7361   | -0.966763 | 0.000201801 | 0.00622006  | yes |
| XLOC_026734 | XLOC_026734 | Zfp191        | chr18:24168122-24179272 | 26.7941   | 12.9074   | -1.05372  | 0.000343152 | 0.00928101  | yes |
| XLOC_026770 | XLOC_026770 | Cdc23         | chr18:34758245-34811390 | 9.70274   | 3.24904   | -1.57838  | 2.81E-05    | 0.00141797  | yes |
| XLOC_026806 | XLOC_026806 | Nr3c1         | chr18:39570198-39646899 | 3.86439   | 1.43013   | -1.43409  | 0.0019803   | 0.0356227   | yes |
| XLOC_026815 | XLOC_026815 | Dpysl3        | chr18:43483880-43552985 | 64.0431   | 22.6996   | -1.49638  | 1.11E-07    | 2.32E-05    | yes |
| XLOC_026871 | XLOC_026871 | Nars          | chr18:64659281-64676211 | 16.6422   | 5.50175   | -1.59688  | 4.41E-06    | 0.000352542 | yes |
| XLOC_026883 | XLOC_026883 | Spire1        | chr18:67647862-67712375 | 10.0963   | 3.65219   | -1.46699  | 2.53E-05    | 0.00132625  | yes |
| XLOC_026884 | XLOC_026884 | Cep76         | chr18:67777050-67800990 | 3.74458   | 1.03176   | -1.85969  | 0.00148741  | 0.028503    | yes |
| XLOC_026908 | XLOC_026908 | Adnp2         | chr18:80323074-80348221 | 7.08214   | 2.09044   | -1.76038  | 0.000434648 | 0.0110987   | yes |
| XLOC_028237 | XLOC_028237 | Acy3          | chr19:3986660-3990005   | 0.0047958 | 2.02278   | 8.72035   | 6.60E-08    | 1.59E-05    | yes |
| XLOC_028248 | XLOC_028248 | Ppp1ca        | chr19:4192173-4201603   | 117.54    | 37.3464   | -1.65411  | 1.58E-08    | 5.36E-06    | yes |
| XLOC_028308 | XLOC_028308 | Rasgrp2       | chr19:6400582-6415216   | 0.109782  | 2.82815   | 4.68715   | 0.000556837 | 0.0133914   | yes |
| XLOC_028323 | XLOC_028323 | Snhg1,Snord22 | chr19:8797976-8800937   | 9074.54   | 2363.19   | -1.94109  | 7.50E-12    | 7.80E-09    | yes |
| XLOC_028344 | XLOC_028344 | Fth1          | chr19:10057192-10076123 | 26.1275   | 9.09029   | -1.52317  | 0.000105863 | 0.00384302  | yes |
| XLOC_028346 | XLOC_028346 | Fads3         | chr19:10116037-10134161 | 2.73609   | 0.168545  | -4.02091  | 2.02E-09    | 9.94E-07    | yes |
| XLOC_028357 | XLOC_028357 | Prpf19        | chr19:10969781-10980021 | 32.4399   | 14.6813   | -1.14379  | 0.00048623  | 0.012101    | yes |
| XLOC_028468 | XLOC_028468 | Cstf2t        | chr19:30641397-31839678 | 32.2317   | 16.1217   | -0.99948  | 0.000790696 | 0.017663    | yes |
| XLOC_028529 | XLOC_028529 | Zfyve27       | chr19:42245056-42269248 | 4.8095    | 1.43988   | -1.73993  | 3.93E-07    | 6.40E-05    | yes |
| XLOC_028574 | XLOC_028574 | 6330577E15Rik | chr19:47806245-47810078 | 8.57573   | 24.5246   | 1.5159    | 0.00241748  | 0.0418568   | yes |
| XLOC_028576 | XLOC_028576 | Gsto2         | chr19:47940034-47960795 | 2.82761   | 0.0240155 | -6.87947  | 2.01E-05    | 0.00112058  | yes |
| XLOC_028621 | XLOC_028621 | Aldh3b1       | chr19:3913490-3929716   | 0.0108762 | 2.1854    | 7.65058   | 1.51E-06    | 0.000167117 | yes |
| XLOC_028656 | XLOC_028656 | Banf1         | chr19:5364639-5366645   | 15.0353   | 2.36915   | -2.66591  | 5.84E-05    | 0.00246925  | yes |
| XLOC_028665 | XLOC_028665 | Kat5          | chr19:5603013-5610094   | 16.5142   | 5.57446   | -1.5668   | 0.0016049   | 0.0302979   | yes |
| XLOC_028672 | XLOC_028672 | Malat1        | chr19:5795689-5802671   | 33.127    | 17.4444   | -0.925246 | 0.000718548 | 0.0164491   | yes |
| XLOC_028683 | XLOC_028683 | Zfp1          | chr19:6080037-6084891   | 2.78978   | 0.0397247 | -6.13397  | 2.41E-06    | 0.000229337 | yes |
| XLOC_028698 | XLOC_028698 | Vegfb         | chr19:7056961-7062141   | 0.338538  | 8.43133   | 4.63837   | 0.000105962 | 0.00384302  | yes |
| XLOC_028729 | XLOC_028729 | Fads2         | chr19:10137253-10176104 | 23.9405   | 4.91087   | -2.2854   | 1.64E-14    | 2.72E-11    | yes |
| XLOC_028737 | XLOC_028737 | Tmem138       | chr19:10645374-10651587 | 5.74743   | 0.430842  | -3.73769  | 4.10E-05    | 0.00186933  | yes |
| XLOC_028830 | XLOC_028830 | Ak3           | chr19:29094946-29123219 | 21.1326   | 4.61416   | -2.19533  | 2.12E-07    | 4.09E-05    | yes |
| XLOC_028866 | XLOC_028866 | Rbp4          | chr19:38191109-38199811 | 0.104375  | 4.72085   | 5.4992    | 0.000100318 | 0.00367225  | yes |
| XLOC_028867 | XLOC_028867 | 5730455O13Rik | chr19:38262968-38298622 | 3.23551   | 0.0303722 | -6.7351   | 2.68E-06    | 0.000245273 | yes |
| XLOC_028930 | XLOC_028930 | Arl3          | chr19:46605598-46647575 | 7.66243   | 0.943799  | -3.02125  | 0.000448347 | 0.0113654   | yes |
| XLOC_028952 | XLOC_028952 | Dclre1a       | chr19:56603650-56622516 | 3.56613   | 0.428956  | -3.05546  | 3.33E-05    | 0.00160918  | yes |
| XLOC_029916 | XLOC_029916 | Nudt5         | chr2:5766079-5791993    | 9.88251   | 2.38754   | -2.04935  | 5.96E-06    | 0.000447092 | yes |
| XLOC_029968 | XLOC_029968 | Ankrd16       | chr2:11699379-11711950  | 10.3154   | 1.20929   | -3.09256  | 0.000469396 | 0.0117566   | yes |
| XLOC_029985 | XLOC_029985 | CommD3        | chr2:18594088-18597871  | 28.8631   | 12.0681   | -1.25803  | 0.00152663  | 0.0291656   | yes |
| XLOC_029990 | XLOC_029990 | MsrB2         | chr2:19293262-19316597  | 5.12801   | 0.064921  | -6.30357  | 7.61E-06    | 0.000528495 | yes |
| XLOC_030066 | XLOC_030066 | Ralgds        | chr2:28368686-28408602  | 11.2836   | 3.50354   | -1.68734  | 0.000129249 | 0.00441725  | yes |
| XLOC_030074 | XLOC_030074 | Rapgef1       | chr2:29475239-29595908  | 11.3417   | 5.58057   | -1.02315  | 0.000833239 | 0.0184169   | yes |
| XLOC_030179 | XLOC_030179 | Gm13498       | chr2:50765203-50767366  | 6.48536   | 0.398928  | -4.02298  | 9.06E-05    | 0.00344642  | yes |
| XLOC_030204 | XLOC_030204 | B3galt1       | chr2:67955769-67960747  | 4.69285   | 0.918523  | -2.35308  | 0.000526992 | 0.0127813   | yes |
| XLOC_030260 | XLOC_030260 | Dnajc10       | chr2:80155622-80194216  | 18.5332   | 7.72262   | -1.26295  | 1.63E-05    | 0.000952627 | yes |

|             |             |                       |                          |           |           |          |             |             |     |
|-------------|-------------|-----------------------|--------------------------|-----------|-----------|----------|-------------|-------------|-----|
| XLOC_030263 | XLOC_030263 | Zfp804a               | chr2:81893814-82100035   | 3.52029   | 0.613928  | -2.51955 | 0.000155394 | 0.00514291  | yes |
| XLOC_030276 | XLOC_030276 | Ypel4                 | chr2:84574360-84578034   | 0.053778  | 2.48075   | 5.52761  | 3.98E-05    | 0.00183176  | yes |
| XLOC_030364 | XLOC_030364 | Nup160                | chr2:90517371-90576485   | 2.61695   | 0.887352  | -1.56031 | 0.00230749  | 0.0401738   | yes |
| XLOC_030368 | XLOC_030368 | C1qtnf4               | chr2:90725942-90730683   | 0.348368  | 8.2125    | 4.55914  | 0.0012742   | 0.0253773   | yes |
| XLOC_030497 | XLOC_030497 | Pdia3                 | chr2:121239637-121268337 | 43.1406   | 20.4597   | -1.07626 | 0.00022124  | 0.00659897  | yes |
| XLOC_030501 | XLOC_030501 | Casc4                 | chr2:121692705-121761943 | 6.09574   | 0.120297  | -5.66313 | 0           | 0           | yes |
| XLOC_030519 | XLOC_030519 | Dut                   | chr2:125072983-125084785 | 16.404    | 3.62591   | -2.17764 | 4.90E-07    | 7.48E-05    | yes |
| XLOC_030561 | XLOC_030561 | Snord57               | chr2:130100147-130110187 | 87.9425   | 4.37068   | -4.33063 | 0.00269357  | 0.0454049   | yes |
| XLOC_030580 | XLOC_030580 | Cds2                  | chr2:132088992-132137777 | 4.17247   | 10.2175   | 1.29207  | 0.000228868 | 0.00676077  | yes |
| XLOC_030592 | XLOC_030592 | Snap25                | chr2:136539185-136608172 | 102.318   | 24.018    | -2.09088 | 0           | 0           | yes |
| XLOC_030620 | XLOC_030620 | Xrn2                  | chr2:146838795-146903733 | 14.2726   | 4.41761   | -1.69191 | 1.14E-05    | 0.000718049 | yes |
| XLOC_030662 | XLOC_030662 | Mcts2                 | chr2:152495196-152534404 | 5.09334   | 0.0897521 | -5.82652 | 5.92E-05    | 0.00249646  | yes |
| XLOC_030664 | XLOC_030664 | Cox4i2                | chr2:152579908-152590773 | 15.0584   | 0.424371  | -5.1491  | 3.64E-05    | 0.00171681  | yes |
| XLOC_030695 | XLOC_030695 | Chmp4b                | chr2:154482761-154520519 | 6.76787   | 24.5155   | 1.85692  | 0.00109843  | 0.022772    | yes |
| XLOC_030696 | XLOC_030696 | Raly                  | chr2:154616845-154692997 | 104.03    | 21.1604   | -2.29756 | 4.05E-06    | 0.000330761 | yes |
| XLOC_030722 | XLOC_030722 | Manbal                | chr2:157193329-15722499  | 0.666392  | 12.9798   | 4.28376  | 0.000349032 | 0.00941566  | yes |
| XLOC_030786 | XLOC_030786 | Dnttip1               | chr2:164571514-164593719 | 2.46047   | 20.4644   | 3.05611  | 0.000175162 | 0.00563101  | yes |
| XLOC_030802 | XLOC_030802 | Arfgef2               | chr2:166631080-166723551 | 2.62718   | 0.741638  | -1.82473 | 0.00110838  | 0.0229291   | yes |
| XLOC_030805 | XLOC_030805 | 1500012F01Rik,Snord12 | chr2:166861296-166891373 | 1149.54   | 5210.09   | 2.18026  | 2.93E-11    | 2.56E-08    | yes |
| XLOC_030831 | XLOC_030831 | Vapb                  | chr2:173563071-173609837 | 3.89551   | 1.03786   | -1.90821 | 0.00184089  | 0.033647    | yes |
| XLOC_030868 | XLOC_030868 | Col9a3                | chr2:180332926-180377396 | 644.875   | 3.05277   | -7.72276 | 5.53E-11    | 4.34E-08    | yes |
| XLOC_030888 | XLOC_030888 | Polr3k                | chr2:181599064-181605531 | 5.06696   | 13.3858   | 1.40151  | 0.0018176   | 0.0333259   | yes |
| XLOC_030899 | XLOC_030899 | Sec61a2               | chr2:5792032-5816399     | 5.23892   | 0.998991  | -2.39073 | 0.00190063  | 0.0345193   | yes |
| XLOC_030911 | XLOC_030911 | Fbxo18                | chr2:11664199-11669154   | 12.6604   | 4.50906   | -1.48942 | 8.01E-05    | 0.00313122  | yes |
| XLOC_030915 | XLOC_030915 | Rsu1                  | chr2:12998635-13192905   | 0.859962  | 10.1186   | 3.55659  | 0.00128476  | 0.0255042   | yes |
| XLOC_030955 | XLOC_030955 | BC029214              | chr2:25315007-25316614   | 2.5727    | 0.135149  | -4.25065 | 0.00225034  | 0.0394633   | yes |
| XLOC_030956 | XLOC_030956 | Ptgds                 | chr2:25322231-25325269   | 2.3603    | 0.0181387 | -7.02375 | 3.09E-05    | 0.00152224  | yes |
| XLOC_030982 | XLOC_030982 | Agpat2                | chr2:26449106-26459730   | 0.0834148 | 2.14901   | 4.68723  | 0.000714175 | 0.0163848   | yes |
| XLOC_030998 | XLOC_030998 | 1700007K13Rik         | chr2:28317520-28321844   | 0.0284041 | 12.9052   | 8.82764  | 1.50E-08    | 5.25E-06    | yes |
| XLOC_031051 | XLOC_031051 | Fbxw2                 | chr2:34659883-34681755   | 22.0306   | 11.5923   | -0.92634 | 0.00158011  | 0.0298964   | yes |
| XLOC_031095 | XLOC_031095 | Rbm43                 | chr2:51779968-51790529   | 1.12864   | 13.3237   | 3.56134  | 1.23E-05    | 0.000763109 | yes |
| XLOC_031125 | XLOC_031125 | Scn3a                 | chr2:65295174-65405549   | 2.2378    | 0.406542  | -2.4606  | 6.20E-06    | 0.000459151 | yes |
| XLOC_031132 | XLOC_031132 | Spc25                 | chr2:69031951-69044247   | 97.3845   | 37.9154   | -1.36091 | 1.19E-06    | 0.000140736 | yes |
| XLOC_031149 | XLOC_031149 | Chn1                  | chr2:73448716-73613403   | 10.5894   | 4.04645   | -1.38789 | 9.42E-05    | 0.00355285  | yes |
| XLOC_031156 | XLOC_031156 | Ttc30b                | chr2:75773906-75776519   | 3.94776   | 0.710275  | -2.47458 | 0.000157165 | 0.00517251  | yes |
| XLOC_031158 | XLOC_031158 | Ttc30a1               | chr2:75817162-75820024   | 3.03507   | 0.609213  | -2.31671 | 0.00113727  | 0.0233232   | yes |
| XLOC_031180 | XLOC_031180 | Zdhhc5                | chr2:84518558-84555321   | 9.16709   | 2.63321   | -1.79964 | 7.47E-06    | 0.00052258  | yes |
| XLOC_031394 | XLOC_031394 | Elp4                  | chr2:105540265-105744657 | 4.59444   | 12.6937   | 1.46615  | 0.000335079 | 0.00910396  | yes |
| XLOC_031434 | XLOC_031434 | Aqr                   | chr2:113926890-114001075 | 9.24031   | 4.03849   | -1.19413 | 0.00183615  | 0.0336019   | yes |
| XLOC_031443 | XLOC_031443 | Srp14                 | chr2:118301578-118305432 | 11.3485   | 0.151546  | -6.22661 | 2.99E-07    | 5.31E-05    | yes |
| XLOC_031457 | XLOC_031457 | Ndufaf1               | chr2:119481186-119488534 | 1.60179   | 15.7928   | 3.30151  | 0.000397955 | 0.0104071   | yes |
| XLOC_031571 | XLOC_031571 | Flrt3                 | chr2:140221165-142215786 | 6.56832   | 0.796077  | -3.04454 | 7.78E-10    | 4.61E-07    | yes |
| XLOC_031581 | XLOC_031581 | Crnk1                 | chr2:145728976-145760436 | 16.9319   | 3.8768    | -2.1268  | 1.35E-06    | 0.000154822 | yes |
| XLOC_031635 | XLOC_031635 | Eif2s2                | chr2:154697067-154718642 | 14.0781   | 6.30012   | -1.16    | 0.00139434  | 0.0271172   | yes |
| XLOC_031663 | XLOC_031663 | Ghrh                  | chr2:157155231-157172391 | 0.0295719 | 2.35272   | 6.31396  | 0.000146147 | 0.00488836  | yes |

|             |             |                |                          |           |            |           |             |             |     |
|-------------|-------------|----------------|--------------------------|-----------|------------|-----------|-------------|-------------|-----|
| XLOC_031680 | XLOC_031680 | Serinc3        | chr2:163449008-163471536 | 29.7411   | 7.56774    | -1.97452  | 5.89E-10    | 3.56E-07    | yes |
| XLOC_031755 | XLOC_031755 | Ctsz           | chr2:174241304-174264493 | 4.92417   | 0.900003   | -2.45188  | 0.00181166  | 0.0332363   | yes |
| XLOC_034863 | XLOC_034863 | Kcnmb2         | chr3:31801624-32099102   | 0.0103413 | 2.18952    | 7.72605   | 5.18E-11    | 4.28E-08    | yes |
| XLOC_034883 | XLOC_034883 | Mir1897_Sox2ot | chr3:34459302-34576915   | 3.14187   | 0.304985   | -3.36481  | 0.00184155  | 0.033647    | yes |
| XLOC_034885 | XLOC_034885 | Atp11b         | chr3:35653059-35755211   | 10.3729   | 3.69225    | -1.49024  | 0.0011415   | 0.0233232   | yes |
| XLOC_034900 | XLOC_034900 | Plk4           | chr3:40603872-40620936   | 12.1386   | 5.18699    | -1.22664  | 0.00228224  | 0.0398669   | yes |
| XLOC_034943 | XLOC_034943 | 4933417G07Rik  | chr3:55429119-55987623   | 0.233507  | 4.4063     | 4.23803   | 0.00238811  | 0.041506    | yes |
| XLOC_034992 | XLOC_034992 | Arhgef26       | chr3:62142698-62266143   | 3.33961   | 0.516425   | -2.69305  | 5.41E-07    | 8.02E-05    | yes |
| XLOC_034994 | XLOC_034994 | Gmps           | chr3:63780064-63826379   | 17.1042   | 9.7902     | -0.804938 | 0.00209258  | 0.0372735   | yes |
| XLOC_035015 | XLOC_035015 | Fstl5          | chr3:75878519-76513927   | 6.2083    | 1.14369    | -2.4405   | 9.87E-05    | 0.00363916  | yes |
| XLOC_035152 | XLOC_035152 | Mrpl9          | chr3:94247257-94252630   | 3.64208   | 41.5773    | 3.51296   | 2.27E-10    | 1.62E-07    | yes |
| XLOC_035171 | XLOC_035171 | Golph3l        | chr3:95392855-95423169   | 15.6655   | 5.68429    | -1.46254  | 0.000366967 | 0.00973454  | yes |
| XLOC_035201 | XLOC_035201 | Prkab2         | chr3:97462134-97477721   | 6.6434    | 1.31606    | -2.3357   | 4.78E-05    | 0.0021223   | yes |
| XLOC_035220 | XLOC_035220 | Sike1          | chr3:102799662-102812385 | 10.0706   | 3.41682    | -1.55942  | 4.71E-05    | 0.00209536  | yes |
| XLOC_035222 | XLOC_035222 | Nras           | chr3:102862207-102871864 | 28.7934   | 12.9856    | -1.14883  | 1.57E-05    | 0.000929653 | yes |
| XLOC_035303 | XLOC_035303 | 1810037117Rik  | chr3:122627314-122629112 | 13.975    | 69.2274    | 2.30849   | 3.75E-06    | 0.000311945 | yes |
| XLOC_035309 | XLOC_035309 | Camk2d         | chr3:126299890-126549250 | 11.1423   | 4.72854    | -1.23658  | 0.00102589  | 0.0215959   | yes |
| XLOC_035393 | XLOC_035393 | Mir186_Zranb2  | chr3:157197360-157211416 | 36.7245   | 18.4848    | -0.9904   | 9.26E-05    | 0.00349949  | yes |
| XLOC_035396 | XLOC_035396 | Lrrc40         | chr3:157699666-157731484 | 14.6857   | 6.0276     | -1.28476  | 0.000399339 | 0.0104347   | yes |
| XLOC_035400 | XLOC_035400 | Pxmp3          | chr3:5560187-5576239     | 20.8151   | 7.75834    | -1.42381  | 0.000157789 | 0.00517852  | yes |
| XLOC_035406 | XLOC_035406 | Tpd52          | chr3:8929435-9004515     | 88.331    | 42.8486    | -1.04367  | 5.26E-05    | 0.00227741  | yes |
| XLOC_035433 | XLOC_035433 | Nlgn1          | chr3:25330748-26230831   | 23.8744   | 13.7216    | -0.799019 | 0.00182311  | 0.0334074   | yes |
| XLOC_035457 | XLOC_035457 | Bbs7           | chr3:36472064-36512311   | 2.28331   | 0.135921   | -4.07028  | 0.000536956 | 0.0129729   | yes |
| XLOC_035482 | XLOC_035482 | Slc7a11        | chr3:50168857-50247535   | 4.99443   | 0.00313407 | -10.6381  | 0           | 0           | yes |
| XLOC_035483 | XLOC_035483 | Elf2           | chr3:51058581-51129958   | 28.2502   | 12.2717    | -1.20292  | 0.000177523 | 0.00568362  | yes |
| XLOC_035493 | XLOC_035493 | Rfxap          | chr3:54607036-54611713   | 4.14943   | 0.589929   | -2.8143   | 4.96E-05    | 0.00217829  | yes |
| XLOC_035512 | XLOC_035512 | Dhx36          | chr3:62272563-62310954   | 14.28     | 6.45771    | -1.1449   | 0.000313366 | 0.00865627  | yes |
| XLOC_035533 | XLOC_035533 | Kpna4          | chr3:68873004-68931014   | 16.3883   | 5.98972    | -1.4521   | 1.04E-07    | 2.26E-05    | yes |
| XLOC_035580 | XLOC_035580 | Rnu73a         | chr3:85941861-85946590   | 19.8458   | 420.922    | 4.40665   | 0.00260215  | 0.0441298   | yes |
| XLOC_035663 | XLOC_035663 | Dap3           | chr3:88724724-88754204   | 4.7412    | 1.73272    | -1.45221  | 0.000385931 | 0.0101264   | yes |
| XLOC_035680 | XLOC_035680 | Cks1b          | chr3:89219393-89222213   | 10.2      | 1.15348    | -3.1445   | 0.00141812  | 0.0274263   | yes |
| XLOC_035748 | XLOC_035748 | Ecm1           | chr3:95538070-95543492   | 0.0706423 | 2.21341    | 4.9696    | 0.000506786 | 0.0124159   | yes |
| XLOC_035830 | XLOC_035830 | Ddx20          | chr3:105481186-105490489 | 8.39521   | 2.11941    | -1.98591  | 0.00109412  | 0.0227125   | yes |
| XLOC_035885 | XLOC_035885 | Slc30a7        | chr3:115641890-115710324 | 3.76085   | 0.647595   | -2.5379   | 1.54E-06    | 0.000168962 | yes |
| XLOC_035976 | XLOC_035976 | Nexn           | chr3:151899947-151929284 | 2.55462   | 0.0682844  | -5.22541  | 0.000109803 | 0.00394137  | yes |
| XLOC_038248 | XLOC_038248 | Tmem55a        | chr4:14791365-14842407   | 3.26455   | 0.708429   | -2.20419  | 0.00271616  | 0.0456688   | yes |
| XLOC_038264 | XLOC_038264 | Mms22l         | chr4:24423608-24530095   | 17.2948   | 7.61188    | -1.18401  | 0.00292274  | 0.0482819   | yes |
| XLOC_038298 | XLOC_038298 | Gm3893         | chr4:41763293-42104673   | 0.0510207 | 1382.85    | 14.7262   | 0           | 0           | yes |
| XLOC_038330 | XLOC_038330 | Melk           | chr4:44313788-44377547   | 4.60677   | 12.0493    | 1.38712   | 0.00294871  | 0.0484886   | yes |
| XLOC_038385 | XLOC_038385 | Snx30          | chr4:59818521-59917612   | 1.94603   | 4.92882    | 1.34071   | 0.00292755  | 0.0482819   | yes |
| XLOC_038455 | XLOC_038455 | Ift74          | chr4:94281210-94359924   | 11.3218   | 2.81012    | -2.0104   | 4.94E-05    | 0.00217411  | yes |
| XLOC_038512 | XLOC_038512 | Txndc12        | chr4:108507282-108534724 | 8.44916   | 1.64642    | -2.35948  | 0.00107199  | 0.0224163   | yes |
| XLOC_038515 | XLOC_038515 | Nrd1           | chr4:108673409-108874877 | 4.5402    | 1.08062    | -2.0709   | 6.44E-06    | 0.00047258  | yes |
| XLOC_038546 | XLOC_038546 | Atpaf1         | chr4:115457589-115484896 | 2.76966   | 0.143288   | -4.27272  | 0.000857504 | 0.0187422   | yes |
| XLOC_038557 | XLOC_038557 | Prdx1          | chr4:116358203-116372605 | 7.77044   | 38.1716    | 2.29643   | 3.93E-07    | 6.40E-05    | yes |

|             |             |                               |                          |           |           |          |             |             |     |
|-------------|-------------|-------------------------------|--------------------------|-----------|-----------|----------|-------------|-------------|-----|
| XLOC_038626 | XLOC_038626 | Oscp1                         | chr4:125735808-125766578 | 1.9107    | 0.0305657 | -5.96605 | 2.01E-05    | 0.00112058  | yes |
| XLOC_038627 | XLOC_038627 | Lsm10                         | chr4:125773896-125775828 | 4.21245   | 0.0618619 | -6.08946 | 1.07E-05    | 0.000681368 | yes |
| XLOC_038653 | XLOC_038653 | Marcks1                       | chr4:129190824-129193225 | 6.7032    | 27.279    | 2.02487  | 4.09E-05    | 0.00186933  | yes |
| XLOC_038671 | XLOC_038671 | Snord99                       | chr4:131864592-131866939 | 12.8547   | 549.836   | 5.41863  | 0.000354601 | 0.00950447  | yes |
| XLOC_038757 | XLOC_038757 | B330016D10Rik                 | chr4:141102076-141104228 | 2.31398   | 0.0502663 | -5.52464 | 7.30E-05    | 0.00291073  | yes |
| XLOC_038788 | XLOC_038788 | 1700029I01Rik,Gm13139,Gm13152 | chr4:146237770-146887529 | 6.28893   | 1.77716   | -1.82324 | 0.00192958  | 0.0349833   | yes |
| XLOC_038975 | XLOC_038975 | Cd72                          | chr4:43455148-43467498   | 0.0109352 | 2.09137   | 7.57932  | 0.00255163  | 0.0435994   | yes |
| XLOC_038998 | XLOC_038998 | Exosc3                        | chr4:45329501-45333475   | 7.18105   | 0.557431  | -3.68733 | 0.00265002  | 0.0448447   | yes |
| XLOC_039011 | XLOC_039011 | Alg2                          | chr4:47482704-47487239   | 10.1164   | 21.497    | 1.08745  | 0.00266301  | 0.0450403   | yes |
| XLOC_039066 | XLOC_039066 | Cdc26                         | chr4:62054428-62069657   | 12.2304   | 2.4698    | -2.30801 | 0.00078469  | 0.0176069   | yes |
| XLOC_039085 | XLOC_039085 | Tle1                          | chr4:71778175-71861953   | 6.39989   | 24.8061   | 1.95457  | 0.000336346 | 0.00913048  | yes |
| XLOC_039122 | XLOC_039122 | Klhl9                         | chr4:88364195-88368412   | 6.98971   | 15.1581   | 1.11678  | 0.00193557  | 0.0349971   | yes |
| XLOC_039338 | XLOC_039338 | Ythdf2                        | chr4:131740830-131768171 | 21.2078   | 9.18086   | -1.2079  | 2.81E-05    | 0.00141797  | yes |
| XLOC_039341 | XLOC_039341 | Rnu11                         | chr4:131825993-131826101 | 0.571194  | 15.443    | 4.75683  | 0.00236024  | 0.0410467   | yes |
| XLOC_039384 | XLOC_039384 | Tmem57                        | chr4:134358666-134409260 | 16.8416   | 7.01642   | -1.26322 | 4.51E-05    | 0.00203434  | yes |
| XLOC_039400 | XLOC_039400 | C1qc                          | chr4:136445716-136448829 | 0.0474395 | 2.31828   | 5.61082  | 0.000283708 | 0.00799883  | yes |
| XLOC_039432 | XLOC_039432 | Necap2                        | chr4:140622426-140634260 | 1.98951   | 0.0215261 | -6.53018 | 8.31E-08    | 1.98E-05    | yes |
| XLOC_039492 | XLOC_039492 | Cort                          | chr4:148499299-148500850 | 0.0706181 | 2.86673   | 5.34323  | 2.70E-05    | 0.00139157  | yes |
| XLOC_041899 | XLOC_041899 | Psmc2                         | chr5:21291100-21309602   | 15.5559   | 3.89817   | -1.9966  | 8.99E-06    | 0.000596945 | yes |
| XLOC_041924 | XLOC_041924 | Insig1                        | chr5:28397947-28405224   | 42.1594   | 18.1691   | -1.21436 | 9.63E-06    | 0.000630418 | yes |
| XLOC_041928 | XLOC_041928 | Rnf32                         | chr5:29524545-29551831   | 1.97456   | 0.0229069 | -6.4296  | 0.000143646 | 0.00481498  | yes |
| XLOC_041941 | XLOC_041941 | Cenpa                         | chr5:30969274-30977199   | 5.90658   | 21.0329   | 1.83225  | 0.00110988  | 0.0229337   | yes |
| XLOC_041951 | XLOC_041951 | Cad                           | chr5:31357183-31380852   | 2.06058   | 6.50059   | 1.65752  | 0.000317138 | 0.00874509  | yes |
| XLOC_041972 | XLOC_041972 | 4933407H18Rik                 | chr5:33721344-33762403   | 2.43304   | 0.150084  | -4.01891 | 2.61E-10    | 1.82E-07    | yes |
| XLOC_042050 | XLOC_042050 | Tbc1d19                       | chr5:54200865-54295619   | 6.68881   | 0.798746  | -3.06594 | 7.82E-05    | 0.00306243  | yes |
| XLOC_042173 | XLOC_042173 | Mrps18c                       | chr5:101227777-101233521 | 6.85346   | 0.0650774 | -6.71853 | 1.64E-06    | 0.000175668 | yes |
| XLOC_042216 | XLOC_042216 | Rpl5                          | chr5:108329571-108416096 | 190.996   | 44.3609   | -2.10618 | 5.74E-13    | 7.22E-10    | yes |
| XLOC_042221 | XLOC_042221 | Pde6b                         | chr5:108817387-108861492 | 1.76802   | 6.71558   | 1.92537  | 0.00273468  | 0.0458371   | yes |
| XLOC_042232 | XLOC_042232 | Golga3                        | chr5:110605719-110654077 | 5.65363   | 2.40514   | -1.23306 | 0.00232387  | 0.0404366   | yes |
| XLOC_042233 | XLOC_042233 | Ankle2                        | chr5:110660059-110685669 | 11.3277   | 2.33435   | -2.27877 | 1.11E-11    | 1.06E-08    | yes |
| XLOC_042274 | XLOC_042274 | Spp13                         | chr5:115461532-115548799 | 6.07316   | 15.7479   | 1.37464  | 0.00145873  | 0.028022    | yes |
| XLOC_042283 | XLOC_042283 | Gcn111                        | chr5:116015271-116072663 | 3.23522   | 0.829286  | -1.96392 | 6.41E-06    | 0.00047173  | yes |
| XLOC_042387 | XLOC_042387 | Dnajc30                       | chr5:135540075-135541235 | 4.56136   | 0.155599  | -4.87356 | 0.000632006 | 0.0148356   | yes |
| XLOC_042394 | XLOC_042394 | Rhbdd2                        | chr5:136108523-136122246 | 4.64941   | 0.232512  | -4.32167 | 6.29E-05    | 0.00259598  | yes |
| XLOC_042474 | XLOC_042474 | Zfp12                         | chr5:143996886-144009649 | 3.37585   | 9.82087   | 1.5406   | 0.000915492 | 0.0196809   | yes |
| XLOC_042490 | XLOC_042490 | Arpc1a                        | chr5:145844737-145869625 | 4.71015   | 22.0632   | 2.2278   | 0.000195536 | 0.00606859  | yes |
| XLOC_042503 | XLOC_042503 | Rasl11a                       | chr5:147656646-147659302 | 0.150167  | 4.488     | 4.90143  | 0.000945431 | 0.0202138   | yes |
| XLOC_042511 | XLOC_042511 | Mtus2                         | chr5:148768895-149127641 | 2.03399   | 0.333029  | -2.61059 | 0.00111764  | 0.023073    | yes |
| XLOC_042526 | XLOC_042526 | Gatad1                        | chr5:3639960-3647936     | 52.6882   | 165.8     | 1.65389  | 2.56E-06    | 0.000241068 | yes |
| XLOC_042538 | XLOC_042538 | Adam22                        | chr5:8072343-8368081     | 11.3169   | 5.43632   | -1.05778 | 0.0014377   | 0.0277536   | yes |
| XLOC_042557 | XLOC_042557 | Reln                          | chr5:21390271-21850523   | 8.8497    | 4.26945   | -1.05158 | 0.000858155 | 0.0187433   | yes |
| XLOC_042561 | XLOC_042561 | Srpk2                         | chr5:22940246-23122389   | 6.92811   | 18.2421   | 1.39673  | 1.84E-05    | 0.0010535   | yes |
| XLOC_042620 | XLOC_042620 | Fndc4                         | chr5:31594618-31598250   | 8.85996   | 2.42581   | -1.86883 | 0.000988798 | 0.0209556   | yes |
| XLOC_042632 | XLOC_042632 | Haus3,Poln                    | chr5:34349846-34512097   | 4.07848   | 0.455173  | -3.16354 | 9.05E-05    | 0.00344465  | yes |
| XLOC_042635 | XLOC_042635 | Tnip2                         | chr5:34838744-34856628   | 0.0639456 | 3.51724   | 5.78146  | 2.14E-05    | 0.00116434  | yes |

|             |             |                 |                          |          |            |           |             |             |     |
|-------------|-------------|-----------------|--------------------------|----------|------------|-----------|-------------|-------------|-----|
| XLOC_042654 | XLOC_042654 | Nsg1            | chr5:38528431-38550706   | 10.7725  | 54.6215    | 2.34211   | 2.90E-10    | 1.90E-07    | yes |
| XLOC_042665 | XLOC_042665 | Fbxl5           | chr5:44135856-44173388   | 29.4135  | 15.4974    | -0.924448 | 0.00051332  | 0.0125368   | yes |
| XLOC_042669 | XLOC_042669 | Ldb2            | chr5:44863371-45190946   | 4.29773  | 0.270964   | -3.9874   | 0.00019405  | 0.0060284   | yes |
| XLOC_042734 | XLOC_042734 | Epha5           | chr5:84483787-84846407   | 15.7523  | 7.31087    | -1.10745  | 3.87E-05    | 0.00179566  | yes |
| XLOC_042826 | XLOC_042826 | Hfm1            | chr5:107269215-107354909 | 3.43639  | 0.0127807  | -8.07078  | 3.01E-08    | 9.09E-06    | yes |
| XLOC_042836 | XLOC_042836 | Gak             | chr5:108998349-109058758 | 4.37714  | 1.10254    | -1.98916  | 0.000512114 | 0.0125199   | yes |
| XLOC_042897 | XLOC_042897 | 1500011B03Rik   | chr5:115258204-115263985 | 7.24331  | 27.4389    | 1.9215    | 0.00123014  | 0.024672    | yes |
| XLOC_042980 | XLOC_042980 | Slc15a4         | chr5:128076035-128097762 | 1.88169  | 0.329736   | -2.51264  | 0.000670714 | 0.0155697   | yes |
| XLOC_042985 | XLOC_042985 | Zfp11           | chr5:130160469-130175963 | 1.85325  | 0.0885051  | -4.38816  | 0.000903262 | 0.0195923   | yes |
| XLOC_043026 | XLOC_043026 | Cux1            | chr5:136724004-137043301 | 14.3202  | 5.86117    | -1.28879  | 0.00168561  | 0.0313821   | yes |
| XLOC_043039 | XLOC_043039 | Gnb2            | chr5:137960066-137974544 | 36.3098  | 6.17503    | -2.55584  | 4.87E-13    | 6.65E-10    | yes |
| XLOC_043053 | XLOC_043053 | Mcm7_Mir25      | chr5:138602329-138613090 | 30.0363  | 15.4663    | -0.957575 | 0.0015579   | 0.0295296   | yes |
| XLOC_043059 | XLOC_043059 | Gpc2            | chr5:138714886-138721165 | 21.0152  | 7.73656    | -1.44167  | 5.58E-05    | 0.00239483  | yes |
| XLOC_043061 | XLOC_043061 | Zfp68           | chr5:139044879-139060971 | 9.41948  | 3.12813    | -1.59035  | 0.000149068 | 0.00496494  | yes |
| XLOC_043068 | XLOC_043068 | Zfand2a         | chr5:139947169-139960445 | 4.78977  | 0.809453   | -2.56494  | 9.60E-05    | 0.00358545  | yes |
| XLOC_043107 | XLOC_043107 | Ptcd1           | chr5:145901246-145927973 | 4.1233   | 0.902819   | -2.19129  | 0.000576161 | 0.0137717   | yes |
| XLOC_045469 | XLOC_045469 | Casd1           | chr6:4551065-4593381     | 11.9668  | 1.57643    | -2.9243   | 3.84E-14    | 5.75E-11    | yes |
| XLOC_045496 | XLOC_045496 | Ing3            | chr6:21899614-21926037   | 1.55512  | 5.83911    | 1.90872   | 0.00193704  | 0.0349971   | yes |
| XLOC_045499 | XLOC_045499 | Ptprz1          | chr6:22825501-23002916   | 12.7557  | 6.5266     | -0.966737 | 0.000497475 | 0.0122163   | yes |
| XLOC_045618 | XLOC_045618 | Zfp862          | chr6:48454337-48484831   | 3.90199  | 13.1371    | 1.75137   | 1.83E-07    | 3.55E-05    | yes |
| XLOC_045685 | XLOC_045685 | Abcg2           | chr6:58546665-58642445   | 2.27657  | 9.60448    | 2.07685   | 0.000995183 | 0.0210625   | yes |
| XLOC_045689 | XLOC_045689 | Fam190a         | chr6:61130318-62332857   | 2.93382  | 0.200714   | -3.86957  | 3.84E-05    | 0.00179029  | yes |
| XLOC_045727 | XLOC_045727 | Lrrtm4          | chr6:79968870-79974926   | 3.48479  | 0.00429165 | -9.66532  | 4.10E-11    | 3.48E-08    | yes |
| XLOC_045732 | XLOC_045732 | Loxl3           | chr6:82984194-83004565   | 744.807  | 0.88272    | -9.72069  | 8.56E-10    | 4.89E-07    | yes |
| XLOC_045827 | XLOC_045827 | Setmar          | chr6:108015039-108027114 | 4.91309  | 0.0606495  | -6.33999  | 1.29E-06    | 0.000149392 | yes |
| XLOC_045841 | XLOC_045841 | Ogg1            | chr6:113276969-113293916 | 2.9336   | 0.184026   | -3.99469  | 0.00296186  | 0.0486527   | yes |
| XLOC_045888 | XLOC_045888 | Kdm5a           | chr6:120314116-120394592 | 11.3163  | 4.45989    | -1.34332  | 8.42E-07    | 0.000108835 | yes |
| XLOC_045962 | XLOC_045962 | Clec2d          | chr6:129130639-129136552 | 3.08249  | 0.0388668  | -6.30942  | 6.10E-07    | 8.68E-05    | yes |
| XLOC_045983 | XLOC_045983 | 2700089E24Rik   | chr6:133055256-133057764 | 3.73439  | 14.4947    | 1.95658   | 0.000468655 | 0.0117523   | yes |
| XLOC_045986 | XLOC_045986 | Etv6            | chr6:133985724-134220165 | 1.50301  | 5.65844    | 1.91255   | 0.000431848 | 0.0110537   | yes |
| XLOC_046063 | XLOC_046063 | Asns            | chr6:7625170-7643182     | 4.65834  | 0.857592   | -2.44145  | 7.09E-05    | 0.00284396  | yes |
| XLOC_046095 | XLOC_046095 | Pot1a           | chr6:25693734-25759226   | 4.28828  | 1.42344    | -1.59102  | 0.0022181   | 0.0390725   | yes |
| XLOC_046214 | XLOC_046214 | Tra2a           | chr6:49193919-49214051   | 42.5582  | 21.9731    | -9.953696 | 0.00169256  | 0.0314928   | yes |
| XLOC_046222 | XLOC_046222 | Skap2           | chr6:51809163-51962548   | 0.827746 | 6.81149    | 3.04071   | 0.00293704  | 0.0483726   | yes |
| XLOC_046302 | XLOC_046302 | Gadd45a         | chr6:66985089-66987401   | 13.9122  | 0.814587   | -4.09414  | 0.00122349  | 0.0245699   | yes |
| XLOC_046329 | XLOC_046329 | Ctnna2          | chr6:76831630-77929661   | 11.8373  | 3.85754    | -1.61758  | 1.59E-05    | 0.000933419 | yes |
| XLOC_046369 | XLOC_046369 | Pcyox1          | chr6:86335999-86347144   | 4.06435  | 0.868586   | -2.22628  | 1.43E-07    | 2.83E-05    | yes |
| XLOC_046372 | XLOC_046372 | Snmp27          | chr6:86625162-86634485   | 19.6533  | 3.73823    | -2.39434  | 0.00103337  | 0.0217389   | yes |
| XLOC_046465 | XLOC_046465 | Raf1            | chr6:115551955-115626653 | 21.213   | 9.09767    | -1.22138  | 1.98E-05    | 0.0011167   | yes |
| XLOC_046467 | XLOC_046467 | Rpl32_Snora7a   | chr6:115724574-115758761 | 2599.89  | 1313.03    | -0.985552 | 8.22E-06    | 0.000560476 | yes |
| XLOC_046471 | XLOC_046471 | Tmcc1           | chr6:115968635-116143392 | 4.41134  | 1.54982    | -1.50912  | 0.00121174  | 0.0245356   | yes |
| XLOC_046524 | XLOC_046524 | Tpi1            | chr6:124758958-124764314 | 71.1863  | 37.8772    | -0.910268 | 0.00137955  | 0.0269309   | yes |
| XLOC_046528 | XLOC_046528 | Gpr162          | chr6:124808413-124813935 | 11.0319  | 3.74232    | -1.55968  | 0.00129321  | 0.0255776   | yes |
| XLOC_046534 | XLOC_046534 | Ncapd2_Scarna10 | chr6:125118024-125141636 | 1675.2   | 913.545    | -0.874784 | 0.00172468  | 0.0319579   | yes |
| XLOC_046587 | XLOC_046587 | Magohb          | chr6:131234406-131243262 | 9.32638  | 0.696086   | -3.74398  | 0.00217167  | 0.038301    | yes |

|             |             |                        |                          |           |            |          |             |             |     |
|-------------|-------------|------------------------|--------------------------|-----------|------------|----------|-------------|-------------|-----|
| XLOC_046589 | XLOC_046589 | Csda                   | chr6:131314862-131338468 | 21.7088   | 9.83064    | -1.14293 | 0.00226465  | 0.0396698   | yes |
| XLOC_048637 | XLOC_048637 | Peg3                   | chr7:6656590-6683130     | 0.0468131 | 17.2057    | 8.52176  | 4.99E-05    | 0.00218802  | yes |
| XLOC_048675 | XLOC_048675 | Zfp128                 | chr7:13466526-13478771   | 3.13292   | 0.131767   | -4.57145 | 2.05E-05    | 0.00112913  | yes |
| XLOC_048684 | XLOC_048684 | Lig1                   | chr7:13844315-13896776   | 5.74662   | 1.76681    | -1.70157 | 0.00264287  | 0.0447719   | yes |
| XLOC_048740 | XLOC_048740 | Eml2                   | chr7:19766518-19791831   | 0.819023  | 7.2604     | 3.14807  | 0.00129146  | 0.025559    | yes |
| XLOC_048809 | XLOC_048809 | Plaur                  | chr7:25247518-25260892   | 0.022502  | 1.75156    | 6.28244  | 4.32E-06    | 0.000348105 | yes |
| XLOC_048856 | XLOC_048856 | Z310022A10Rik          | chr7:28338313-28367117   | 3.29374   | 0.245149   | -3.748   | 0.00251808  | 0.0432411   | yes |
| XLOC_048879 | XLOC_048879 | Fbxo17                 | chr7:29501808-29523189   | 4.26295   | 0.00774201 | -9.10493 | 2.68E-09    | 1.30E-06    | yes |
| XLOC_048884 | XLOC_048884 | Hnmp1                  | chr7:29595908-29607306   | 81.565    | 21.6426    | -1.91407 | 3.42E-14    | 5.37E-11    | yes |
| XLOC_048887 | XLOC_048887 | Lgals7                 | chr7:29649404-29651303   | 3.62406   | 0.0297073  | -6.93064 | 6.31E-05    | 0.00259969  | yes |
| XLOC_048902 | XLOC_048902 | Zfp382                 | chr7:30906966-30920051   | 2.47859   | 0.0371999  | -6.05807 | 1.05E-05    | 0.000672136 | yes |
| XLOC_048938 | XLOC_048938 | Gm2058                 | chr7:46843887-46847072   | 6.88555   | 1.5689     | -2.13381 | 0.00219381  | 0.0386662   | yes |
| XLOC_049008 | XLOC_049008 | Rras                   | chr7:52273376-52277014   | 3.29305   | 0.0530456  | -5.95605 | 3.87E-06    | 0.000317969 | yes |
| XLOC_049049 | XLOC_049049 | Tmem86a                | chr7:54306009-54310157   | 2.73132   | 0.297879   | -3.1968  | 0.000402383 | 0.0104793   | yes |
| XLOC_049063 | XLOC_049063 | Tube5                  | chr7:63049517-63086817   | 10.224    | 2.90086    | -1.81741 | 1.65E-05    | 0.00095876  | yes |
| XLOC_049075 | XLOC_049075 | Trpm1                  | chr7:71298720-71414768   | 2.26032   | 0.111779   | -4.33781 | 8.81E-06    | 0.000588798 | yes |
| XLOC_049079 | XLOC_049079 | Apba2                  | chr7:71646591-71899467   | 9.3354    | 20.9501    | 1.16617  | 0.00110739  | 0.0229274   | yes |
| XLOC_049133 | XLOC_049133 | Mesdc2                 | chr7:91040509-91050042   | 4.08712   | 1.247      | -1.71262 | 0.000720158 | 0.0164619   | yes |
| XLOC_049157 | XLOC_049157 | Dlg2                   | chr7:98239295-99597599   | 3.31949   | 0.774443   | -2.09973 | 0.000410497 | 0.0106324   | yes |
| XLOC_049171 | XLOC_049171 | Rsf1                   | chr7:104728405-104841292 | 2.56994   | 1.02826    | -1.32153 | 0.00100048  | 0.021146    | yes |
| XLOC_049206 | XLOC_049206 | Z320002M19Rik          | chr7:109044928-109060417 | 16.024    | 3.7595     | -2.09162 | 0.000440176 | 0.0112125   | yes |
| XLOC_049326 | XLOC_049326 | Ipo7,Snora23           | chr7:117161794-117198628 | 565.511   | 179.389    | -1.65646 | 1.10E-09    | 5.85E-07    | yes |
| XLOC_049332 | XLOC_049332 | Ctr9                   | chr7:118172464-118199891 | 19.7529   | 5.40118    | -1.87072 | 3.56E-08    | 1.02E-05    | yes |
| XLOC_049382 | XLOC_049382 | Rbbp6                  | chr7:130114004-130146086 | 18.1373   | 3.08972    | -2.55341 | 8.45E-08    | 1.99E-05    | yes |
| XLOC_049402 | XLOC_049402 | Fam57b                 | chr7:133960398-133973733 | 1.96624   | 0.0272454  | -6.17328 | 7.10E-05    | 0.00284396  | yes |
| XLOC_049411 | XLOC_049411 | Zfp771                 | chr7:134388039-134398315 | 6.01005   | 0.0976153  | -5.94413 | 0.000445084 | 0.0112918   | yes |
| XLOC_049416 | XLOC_049416 | Snora30                | chr7:134671410-134671517 | 127.558   | 1.49465    | -6.4152  | 1.48E-06    | 0.000164632 | yes |
| XLOC_049461 | XLOC_049461 | Lhpp                   | chr7:139802325-139898102 | 0.0951769 | 2.47939    | 4.70323  | 0.00088887  | 0.0193202   | yes |
| XLOC_049474 | XLOC_049474 | Ppp2r2d                | chr7:146038068-146074813 | 13.1694   | 3.95598    | -1.73508 | 0.000470506 | 0.0117597   | yes |
| XLOC_049625 | XLOC_049625 | C1cn4-2                | chr7:7234922-7252222     | 13.3082   | 4.04241    | -1.71903 | 5.14E-08    | 1.36E-05    | yes |
| XLOC_049681 | XLOC_049681 | Crx                    | chr7:16450962-16465304   | 61.4708   | 26.6595    | -1.20525 | 3.26E-06    | 0.000280935 | yes |
| XLOC_049693 | XLOC_049693 | Grif1                  | chr7:17079821-17200342   | 5.04492   | 10.3112    | 1.03131  | 0.00117568  | 0.0239002   | yes |
| XLOC_049884 | XLOC_049884 | Capns1                 | chr7:30971960-30980067   | 6.62339   | 0.0807961  | -6.35714 | 0           | 0           | yes |
| XLOC_049887 | XLOC_049887 | Sdhaf1                 | chr7:31106427-31107394   | 22.6201   | 3.94562    | -2.51928 | 0.00119554  | 0.024241    | yes |
| XLOC_049900 | XLOC_049900 | Cox6b1                 | chr7:31401992-31411170   | 4.75255   | 0.0525491  | -6.49889 | 2.40E-07    | 4.52E-05    | yes |
| XLOC_049902 | XLOC_049902 | Rbm42                  | chr7:31426013-31435247   | 1.58824   | 11.869     | 2.9017   | 0.00107833  | 0.0224269   | yes |
| XLOC_049938 | XLOC_049938 | Lrp3                   | chr7:35971403-36000364   | 5.43045   | 1.49033    | -1.86544 | 0.00241065  | 0.0417846   | yes |
| XLOC_049995 | XLOC_049995 | Rps11,Snord35b         | chr7:52377733-52379759   | 3541.52   | 440.389    | -3.00752 | 0           | 0           | yes |
| XLOC_050100 | XLOC_050100 | Mphosph10              | chr7:71521426-71537122   | 8.46643   | 1.02694    | -3.0434  | 7.10E-05    | 0.00284396  | yes |
| XLOC_050140 | XLOC_050140 | Man2a2                 | chr7:87505335-87516012   | 6.83631   | 2.00307    | -1.771   | 6.60E-06    | 0.00047659  | yes |
| XLOC_050147 | XLOC_050147 | Nmb                    | chr7:88047112-88049957   | 2.9563    | 0.112997   | -4.70943 | 0.00141221  | 0.0274134   | yes |
| XLOC_050157 | XLOC_050157 | Hdgfrp3                | chr7:89003907-89079345   | 12.1431   | 4.26625    | -1.50909 | 4.52E-06    | 0.000359928 | yes |
| XLOC_050218 | XLOC_050218 | Rps3,Snord15a,Snord15b | chr7:106626380-106632219 | 3071.71   | 547.448    | -2.48825 | 0           | 0           | yes |
| XLOC_050241 | XLOC_050241 | Lrrc51                 | chr7:109060925-109082371 | 5.16017   | 0.0477497  | -6.75578 | 3.98E-09    | 1.84E-06    | yes |
| XLOC_050401 | XLOC_050401 | Dkk3                   | chr7:119259532-119302619 | 34.393    | 84.0216    | 1.28864  | 0.00016328  | 0.0053143   | yes |

|             |             |                 |                          |           |            |           |             |             |     |
|-------------|-------------|-----------------|--------------------------|-----------|------------|-----------|-------------|-------------|-----|
| XLOC_050423 | XLOC_050423 | 2310008H09Rik   | chr7:125985551-126138725 | 23.7036   | 12.6348    | -0.907701 | 0.000461736 | 0.0116297   | yes |
| XLOC_050473 | XLOC_050473 | Prrt2           | chr7:134161055-134164725 | 2.55413   | 0.421837   | -2.59807  | 0.0017612   | 0.0325195   | yes |
| XLOC_050492 | XLOC_050492 | 1700008J07Rik   | chr7:134653951-134656383 | 0.0477437 | 2.95322    | 5.95083   | 9.63E-06    | 0.000630418 | yes |
| XLOC_050577 | XLOC_050577 | Hras1           | chr7:148375832-148379903 | 12.5619   | 3.36553    | -1.90015  | 0.000574399 | 0.0137401   | yes |
| XLOC_053368 | XLOC_053368 | Stxbp2          | chr8:3631159-3643644     | 1.90779   | 0.177329   | -3.4274   | 0.0020804   | 0.0371257   | yes |
| XLOC_053399 | XLOC_053399 | Tfdp1           | chr8:13339662-13378448   | 26.1396   | 6.37261    | -2.03628  | 2.72E-05    | 0.00139966  | yes |
| XLOC_053403 | XLOC_053403 | Cdc16           | chr8:13757689-13782230   | 36.654    | 19.5624    | -0.905889 | 0.000795803 | 0.0177518   | yes |
| XLOC_053472 | XLOC_053472 | Whsc1l1         | chr8:26712777-26830139   | 8.65204   | 3.8011     | -1.18662  | 0.000918816 | 0.0197253   | yes |
| XLOC_053519 | XLOC_053519 | Fat1            | chr8:46035561-46137611   | 2.28108   | 0.479602   | -2.24981  | 1.48E-10    | 1.11E-07    | yes |
| XLOC_053536 | XLOC_053536 | Aga             | chr8:54597079-54608776   | 0.0168085 | 1.9972     | 6.89264   | 2.28E-05    | 0.0012278   | yes |
| XLOC_053557 | XLOC_053557 | 1-Mar           | chr8:68141938-68995877   | 6.25867   | 1.26463    | -2.30714  | 0.000340808 | 0.00924359  | yes |
| XLOC_053574 | XLOC_053574 | Pbx4            | chr8:72356602-72396191   | 0.010402  | 2.16595    | 7.702     | 1.11E-06    | 0.000131914 | yes |
| XLOC_053629 | XLOC_053629 | Fam32a          | chr8:74743628-74748930   | 17.9657   | 7.32903    | -1.29355  | 0.000719469 | 0.0164582   | yes |
| XLOC_053667 | XLOC_053667 | Inpp4b          | chr8:84239098-84646460   | 1.81123   | 0.00505262 | -8.48572  | 2.60E-08    | 8.08E-06    | yes |
| XLOC_053669 | XLOC_053669 | Tbc1d9          | chr8:85689250-85796839   | 8.25505   | 2.9008     | -1.50883  | 6.32E-05    | 0.00259969  | yes |
| XLOC_053735 | XLOC_053735 | Gnao1           | chr8:96334705-96493309   | 13.0945   | 2.82331    | -2.2135   | 2.83E-09    | 1.35E-06    | yes |
| XLOC_053829 | XLOC_053829 | Txn14b          | chr8:112089885-112097951 | 2.21768   | 0.105434   | -4.39463  | 0.0015855   | 0.0299804   | yes |
| XLOC_053843 | XLOC_053843 | Aars,Exosc6     | chr8:113557866-113581499 | 16.8092   | 6.37549    | -1.39865  | 0.00034925  | 0.00941566  | yes |
| XLOC_053857 | XLOC_053857 | Cenpn           | chr8:119445639-119465403 | 3.20154   | 0.0838514  | -5.25479  | 7.40E-05    | 0.00293462  | yes |
| XLOC_053865 | XLOC_053865 | Hsbp1           | chr8:121868437-121872829 | 9.71869   | 28.7133    | 1.56289   | 0.00183694  | 0.0336019   | yes |
| XLOC_053873 | XLOC_053873 | Kihl36          | chr8:122386204-122400889 | 2.84014   | 0.367543   | -2.94998  | 0.00049373  | 0.0121789   | yes |
| XLOC_053901 | XLOC_053901 | 4732415M23Rik   | chr8:125736757-125745945 | 1.87739   | 0.0241048  | -6.28326  | 0.000381653 | 0.0100429   | yes |
| XLOC_053907 | XLOC_053907 | Tubb3           | chr8:125935463-125945910 | 10.41     | 40.5782    | 1.96273   | 2.13E-06    | 0.000211848 | yes |
| XLOC_053921 | XLOC_053921 | Gm505           | chr8:127421785-127428738 | 5.46359   | 0.743463   | -2.87752  | 0.000517151 | 0.0126206   | yes |
| XLOC_054011 | XLOC_054011 | Al316807        | chr8:23573014-23680088   | 3.47869   | 15.6306    | 2.16775   | 0.00137508  | 0.0269087   | yes |
| XLOC_054018 | XLOC_054018 | Agpat6          | chr8:24283417-24318925   | 2.26025   | 0.094429   | -4.58111  | 0.000193753 | 0.00602515  | yes |
| XLOC_054092 | XLOC_054092 | D030016E14Rik   | chr8:48575481-48618824   | 3.52127   | 0.514107   | -2.77596  | 0.000201831 | 0.00622006  | yes |
| XLOC_054104 | XLOC_054104 | Galnt16         | chr8:60255019-61390424   | 2.79503   | 0.031985   | -6.44933  | 9.59E-07    | 0.000119553 | yes |
| XLOC_054141 | XLOC_054141 | 2810428I15Rik   | chr8:73028194-73030638   | 2.59682   | 0.0469755  | -5.78869  | 0.000252802 | 0.00732472  | yes |
| XLOC_054165 | XLOC_054165 | Unc13a          | chr8:74150611-74195656   | 1.97051   | 0.15221    | -3.69443  | 0.00024864  | 0.00721079  | yes |
| XLOC_054187 | XLOC_054187 | Abce1           | chr8:82207340-82235639   | 17.5323   | 7.55176    | -1.21513  | 0.000832093 | 0.0184045   | yes |
| XLOC_054195 | XLOC_054195 | Scoc            | chr8:85958377-85982290   | 17.4946   | 5.16207    | -1.76089  | 0.000535085 | 0.0129376   | yes |
| XLOC_054203 | XLOC_054203 | Cc2d1a          | chr8:86656726-86671652   | 2.15092   | 0.136072   | -3.98251  | 0.00179251  | 0.0329621   | yes |
| XLOC_054266 | XLOC_054266 | Fam192a         | chr8:97098840-97125626   | 3.70626   | 0.26716    | -3.79419  | 1.69E-09    | 8.87E-07    | yes |
| XLOC_054280 | XLOC_054280 | Cdh8            | chr8:101552668-101940357 | 4.44093   | 0.0340265  | -7.02806  | 3.62E-08    | 1.03E-05    | yes |
| XLOC_054304 | XLOC_054304 | E130303B06Rik   | chr8:108227551-108232068 | 0.85399   | 12.9709    | 3.92492   | 0.000300737 | 0.00841099  | yes |
| XLOC_054371 | XLOC_054371 | Cott1           | chr8:122333113-122364479 | 3.07764   | 12.4299    | 2.01392   | 0.00294004  | 0.0483967   | yes |
| XLOC_056339 | XLOC_056339 | 5730577I03Rik   | chr9:20411918-20421715   | 2.14797   | 0.0135655  | -7.30689  | 1.03E-09    | 5.60E-07    | yes |
| XLOC_056340 | XLOC_056340 | Ubl5            | chr9:20442230-20451233   | 1144.49   | 0.647002   | -10.7886  | 1.20E-14    | 2.09E-11    | yes |
| XLOC_056368 | XLOC_056368 | Zfp809          | chr9:22030146-22047798   | 2.56637   | 0.122472   | -4.3892   | 0.00174988  | 0.0323296   | yes |
| XLOC_056484 | XLOC_056484 | Hspa8,LOC624853 | chr9:40609355-40613308   | 923.806   | 582.648    | -0.664965 | 0.0020263   | 0.0363254   | yes |
| XLOC_056492 | XLOC_056492 | Thy1            | chr9:43851466-43856662   | 4.57991   | 0.0725838  | -5.97953  | 5.67E-06    | 0.000431809 | yes |
| XLOC_056517 | XLOC_056517 | Bace1           | chr9:45646611-45671738   | 6.75088   | 2.91158    | -1.21327  | 0.0012349   | 0.0247296   | yes |
| XLOC_056525 | XLOC_056525 | 2900052N01Rik   | chr9:46721685-46735449   | 6.18264   | 1.13458    | -2.44606  | 0.00164669  | 0.0308772   | yes |
| XLOC_056527 | XLOC_056527 | Fam55d          | chr9:47970146-48207603   | 5.1845    | 0.0609131  | -6.41131  | 0.000168821 | 0.0054776   | yes |



|             |             |               |                          |           |           |           |             |             |     |
|-------------|-------------|---------------|--------------------------|-----------|-----------|-----------|-------------|-------------|-----|
| XLOC_056534 | XLOC_056534 | Drd2          | chr9:49148766-49215319   | 0.0159276 | 2.19779   | 7.10838   | 9.98E-10    | 5.50E-07    | yes |
| XLOC_056543 | XLOC_056543 | Ppp2r1b       | chr9:50665039-50817178   | 5.6144    | 2.02566   | -1.47074  | 0.00299453  | 0.0489601   | yes |
| XLOC_056558 | XLOC_056558 | Crabp1        | chr9:54612614-54620916   | 3.85075   | 0.331234  | -3.53922  | 0.000929268 | 0.0199361   | yes |
| XLOC_056562 | XLOC_056562 | Chrna5        | chr9:54828686-54855586   | 0.358522  | 3.36737   | 3.23149   | 0.00296148  | 0.0486527   | yes |
| XLOC_056586 | XLOC_056586 | Ubi7          | chr9:57758792-57777775   | 3.13842   | 12.6579   | 2.01193   | 0.00194227  | 0.0350592   | yes |
| XLOC_056593 | XLOC_056593 | Nptn          | chr9:58430046-58589366   | 17.7145   | 18917.4   | 10.0606   | 0           | 0           | yes |
| XLOC_056604 | XLOC_056604 | Uaca          | chr9:60642354-60728177   | 3.15407   | 0.588723  | -2.42155  | 0.00269281  | 0.0454049   | yes |
| XLOC_056612 | XLOC_056612 | Rpl4,Snord16a | chr9:64021193-64026473   | 137.767   | 73.7322   | -0.901864 | 0.000542962 | 0.0131079   | yes |
| XLOC_056624 | XLOC_056624 | Tipin         | chr9:64129413-64152599   | 10.9738   | 40.0363   | 1.86725   | 0.000296299 | 0.00829427  | yes |
| XLOC_056627 | XLOC_056627 | 2010321M09Rik | chr9:64808638-64869524   | 11.8495   | 4.36372   | -1.44119  | 0.000736201 | 0.016664    | yes |
| XLOC_056644 | XLOC_056644 | Ppib          | chr9:65907975-65917538   | 158.484   | 60.5576   | -1.38796  | 7.20E-06    | 0.000509267 | yes |
| XLOC_056664 | XLOC_056664 | Mns1          | chr9:72286335-72306998   | 6.94316   | 1.84058   | -1.91543  | 0.00305219  | 0.0496444   | yes |
| XLOC_056665 | XLOC_056665 | Rfx7          | chr9:72380046-72470756   | 8.55399   | 3.72237   | -1.20038  | 0.00149765  | 0.0286817   | yes |
| XLOC_056691 | XLOC_056691 | Gsta4         | chr9:78039772-78057156   | 9.12268   | 0.661007  | -3.78672  | 0.00216351  | 0.0381965   | yes |
| XLOC_056748 | XLOC_056748 | Dbr1          | chr9:99476217-99484762   | 3.39009   | 0.440699  | -2.94346  | 0.000583272 | 0.0138678   | yes |
| XLOC_056795 | XLOC_056795 | Mon1a         | chr9:107790459-107805470 | 0.107746  | 3.99684   | 5.21316   | 8.12E-05    | 0.00316509  | yes |
| XLOC_056817 | XLOC_056817 | Qrich1        | chr9:108419417-108462498 | 18.4485   | 8.68691   | -1.08659  | 0.00104057  | 0.0218464   | yes |
| XLOC_056829 | XLOC_056829 | Uqcr1         | chr9:108838660-108851691 | 23.8888   | 1.54335   | -3.9522   | 0           | 0           | yes |
| XLOC_056841 | XLOC_056841 | Cspg5         | chr9:110146286-110165080 | 12.1434   | 42.6165   | 1.81123   | 4.08E-09    | 1.86E-06    | yes |
| XLOC_056884 | XLOC_056884 | Wdr48         | chr9:119804007-119846676 | 17.6778   | 5.346     | -1.72541  | 8.23E-07    | 0.000106751 | yes |
| XLOC_056912 | XLOC_056912 | Kif15         | chr9:122860198-122927851 | 11.7167   | 6.00701   | -0.963851 | 0.00213018  | 0.0376928   | yes |
| XLOC_056984 | XLOC_056984 | Fbxl12        | chr9:20442230-20451233   | 3.83467   | 0.157276  | -4.60774  | 0.000205977 | 0.00629313  | yes |
| XLOC_057034 | XLOC_057034 | Jam3          | chr9:26904943-26962965   | 36.4535   | 16.7239   | -1.12415  | 0.000827698 | 0.0183202   | yes |
| XLOC_057035 | XLOC_057035 | Ntm           | chr9:28802317-29770714   | 6.27006   | 1.20817   | -2.37565  | 2.94E-05    | 0.00146984  | yes |
| XLOC_057110 | XLOC_057110 | Gramd1b       | chr9:40105491-40263349   | 3.2158    | 0.323145  | -3.31492  | 0.0020188   | 0.0362323   | yes |
| XLOC_057132 | XLOC_057132 | Trappc4       | chr9:44211841-44215631   | 1.56941   | 15.6077   | 3.31397   | 0.00247662  | 0.0426925   | yes |
| XLOC_057199 | XLOC_057199 | Wdr61         | chr9:54564946-54582335   | 16.0503   | 2.89426   | -2.47133  | 4.49E-05    | 0.00202725  | yes |
| XLOC_057243 | XLOC_057243 | Nr2e3         | chr9:59790348-59797903   | 21.0383   | 5.94676   | -1.82285  | 2.57E-06    | 0.000241068 | yes |
| XLOC_057264 | XLOC_057264 | Rab11a        | chr9:64561051-64585563   | 38.6727   | 22.0199   | -0.812508 | 0.00193693  | 0.0349971   | yes |
| XLOC_057266 | XLOC_057266 | Ptplad1       | chr9:64808638-64869524   | 26.2958   | 12.7116   | -1.04868  | 0.000836569 | 0.0184775   | yes |
| XLOC_057324 | XLOC_057324 | Phip          | chr9:82759716-82869096   | 21.3205   | 12.6549   | -0.752546 | 0.00215018  | 0.0380039   | yes |
| XLOC_057330 | XLOC_057330 | Ube2cbp       | chr9:86200840-86358523   | 2.18525   | 0.0682359 | -5.00113  | 0.000320831 | 0.00882369  | yes |
| XLOC_057392 | XLOC_057392 | Atr           | chr9:95755968-95852146   | 0.109727  | 9.45903   | 6.4297    | 0.000191201 | 0.00598131  | yes |
| XLOC_057417 | XLOC_057417 | Slc25a36      | chr9:96975314-97011460   | 22.7513   | 10.8889   | -1.06309  | 0.00055569  | 0.013374    | yes |
| XLOC_057432 | XLOC_057432 | Tmem22        | chr9:100452606-100471504 | 3.96915   | 0.0419987 | -6.56234  | 7.19E-07    | 9.69E-05    | yes |
| XLOC_057440 | XLOC_057440 | Cdv3          | chr9:103255431-103268110 | 24.5984   | 12.5676   | -0.968851 | 0.000369125 | 0.00978353  | yes |
| XLOC_057450 | XLOC_057450 | Atp2c1        | chr9:105313552-105397447 | 13.2417   | 5.9272    | -1.15967  | 0.000396188 | 0.0103696   | yes |
| XLOC_057532 | XLOC_057532 | Nradd         | chr9:110523638-110526897 | 1.95676   | 0.0269925 | -6.17977  | 0.000158187 | 0.00518614  | yes |
| XLOC_057592 | XLOC_057592 | Ano10         | chr9:122084996-122203492 | 3.47046   | 0.444682  | -2.96428  | 0.000202182 | 0.00622006  | yes |
| XLOC_059468 | XLOC_059468 | Rnf113a1      | chrX:34731337-34732460   | 6.88948   | 0.0702968 | -6.61479  | 1.40E-08    | 5.00E-06    | yes |
| XLOC_059492 | XLOC_059492 | Mcts1         | chrX:35953834-35966741   | 17.3475   | 2.72919   | -2.66819  | 2.05E-05    | 0.00112913  | yes |
| XLOC_059530 | XLOC_059530 | Htatsf1       | chrX:54306791-54320359   | 17.543    | 3.46261   | -2.34096  | 6.65E-06    | 0.000479334 | yes |
| XLOC_059537 | XLOC_059537 | C230004F18Rik | chrX:58369552-58392635   | 3.20395   | 0.0555052 | -5.85108  | 4.52E-05    | 0.00203513  | yes |
| XLOC_059553 | XLOC_059553 | Hmgb3         | chrX:68809145-68813935   | 48.5402   | 21.4515   | -1.1781   | 1.63E-05    | 0.000952439 | yes |
| XLOC_059584 | XLOC_059584 | Emd           | chrX:71500177-71503086   | 4.88168   | 21.4745   | 2.13718   | 0.000333085 | 0.00907038  | yes |

|             |             |                           |                          |         |            |           |             |            |     |
|-------------|-------------|---------------------------|--------------------------|---------|------------|-----------|-------------|------------|-----|
| XLOC_059589 | XLOC_059589 | Gdi1                      | chrX:71550350-71557223   | 78.8329 | 13.3571    | -2.56119  | 0           | 0          | yes |
| XLOC_059609 | XLOC_059609 | Dmd                       | chrX:80194208-82450389   | 3.53666 | 1.25384    | -1.49604  | 0.000626471 | 0.0147277  | yes |
| XLOC_059654 | XLOC_059654 | Nono                      | chrX:98624989-98643948   | 63.1395 | 30.9188    | -1.03006  | 0.000204725 | 0.00626094 | yes |
| XLOC_059657 | XLOC_059657 | Ogt                       | chrX:98835402-98879700   | 36.8554 | 21.7734    | -0.759311 | 0.00128788  | 0.0255042  | yes |
| XLOC_059671 | XLOC_059671 | Uppt                      | chrX:101678120-101701601 | 4.72264 | 0.0437678  | -6.75358  | 6.38E-09    | 2.75E-06   | yes |
| XLOC_059688 | XLOC_059688 | 2810403D21Rik             | chrX:106029816-106082235 | 3.1901  | 0.00621559 | -9.00349  | 1.93E-08    | 6.19E-06   | yes |
| XLOC_059701 | XLOC_059701 | Klhl4                     | chrX:111588128-111674307 | 2.43323 | 0.0705578  | -5.10792  | 8.21E-05    | 0.00319266 | yes |
| XLOC_059736 | XLOC_059736 | Wbp5                      | chrX:132779618-132781678 | 12.8888 | 61.9834    | 2.26576   | 0.000365865 | 0.00971352 | yes |
| XLOC_059744 | XLOC_059744 | Zcchc18                   | chrX:133515654-133572841 | 24.6693 | 11.8659    | -1.05589  | 0.00138169  | 0.0269541  | yes |
| XLOC_059745 | XLOC_059745 | Fam199x                   | chrX:133584132-133617040 | 3.61363 | 0.715702   | -2.33602  | 0.000201843 | 0.00622006 | yes |
| XLOC_059757 | XLOC_059757 | Prps1                     | chrX:136991141-137010679 | 4.93303 | 1.18507    | -2.0575   | 0.00207136  | 0.0370274  | yes |
| XLOC_059892 | XLOC_059892 | Med14                     | chrX:12252496-12339099   | 6.98107 | 3.26411    | -1.09676  | 0.000620278 | 0.014593   | yes |
| XLOC_059957 | XLOC_059957 | Lamp2                     | chrX:35758240-35809632   | 26.6385 | 13.3214    | -0.999773 | 0.000743961 | 0.0167741  | yes |
| XLOC_059966 | XLOC_059966 | Smarca1                   | chrX:45162546-45245729   | 6.01662 | 1.79077    | -1.74837  | 0.000630569 | 0.0148129  | yes |
| XLOC_059974 | XLOC_059974 | Enox2                     | chrX:46363698-46641419   | 3.76554 | 0.355091   | -3.4066   | 0.00136377  | 0.0267501  | yes |
| XLOC_059982 | XLOC_059982 | Rap2c                     | chrX:48357090-48371195   | 9.16166 | 3.51929    | -1.38032  | 0.00179634  | 0.0330131  | yes |
| XLOC_060066 | XLOC_060066 | Cetn2                     | chrX:70158231-70163733   | 19.0033 | 1.47693    | -3.68557  | 0.000977712 | 0.0208049  | yes |
| XLOC_060089 | XLOC_060089 | Flna                      | chrX:71468790-71491873   | 18.0015 | 11.0063    | -0.709787 | 0.00229973  | 0.0401054  | yes |
| XLOC_060134 | XLOC_060134 | Arhgef9                   | chrX:92244282-92361825   | 3.72277 | 0.99285    | -1.90673  | 0.00287523  | 0.0479582  | yes |
| XLOC_060151 | XLOC_060151 | Snx12                     | chrX:98293124-98417902   | 3.13954 | 28.2942    | 3.17188   | 5.52E-07    | 8.06E-05   | yes |
| XLOC_060189 | XLOC_060189 | Fndc3c1                   | chrX:103615381-103680568 | 2.16853 | 0.720184   | -1.59028  | 0.00204422  | 0.0366048  | yes |
| XLOC_060208 | XLOC_060208 | Tspan6                    | chrX:130425608-130432968 | 6.09114 | 25.1821    | 2.04762   | 3.02E-05    | 0.00149286 | yes |
| XLOC_060236 | XLOC_060236 | Tmsb15b1,Tmsb15b2,Tmsb15l | chrX:133489528-133511413 | 15.1013 | 1.56097    | -3.27415  | 0.00250706  | 0.0430754  | yes |
| XLOC_060245 | XLOC_060245 | Tsc22d3                   | chrX:137074067-137135061 | 8.86515 | 21.7264    | 1.29323   | 0.00191404  | 0.0347292  | yes |
| XLOC_060267 | XLOC_060267 | Tro                       | chrX:147079845-147091979 | 19.4357 | 9.51978    | -1.02971  | 0.000363346 | 0.00966299 | yes |
| XLOC_060322 | XLOC_060322 | Tmsb4x                    | chrX:163645025-163647150 | 19.4597 | 6.01655    | -1.69348  | 5.66E-05    | 0.00241443 | yes |

Table S3. The Top2b dependent genes (TDGs) at P6.

| test_id     | gene_id     | gene          | locus                     | Ctrl FPKM | cKO FPKM | log2(fold_change) | p_value     | q_value     | significant |
|-------------|-------------|---------------|---------------------------|-----------|----------|-------------------|-------------|-------------|-------------|
| XLOC_000022 | XLOC_000022 | Tmem70        | chr1:16655271-16668356    | 4.38402   | 2.00862  | -1.12605          | 7.54E-05    | 0.0122435   | yes         |
| XLOC_000111 | XLOC_000111 | Hspe1         | chr1:55144991-55148161    | 12.0692   | 3.05403  | -1.98254          | 4.68E-08    | 1.77E-05    | yes         |
| XLOC_000124 | XLOC_000124 | Bzw1          | chr1:58449945-58464222    | 29.2099   | 18.1414  | -0.68717          | 0.000429508 | 0.0475417   | yes         |
| XLOC_000133 | XLOC_000133 | Nop58         | chr1:59741846-59768354    | 82.4756   | 17.2076  | -2.26092          | 0           | 0           | yes         |
| XLOC_000156 | XLOC_000156 | Crygf         | chr1:65973095-65974878    | 2.16827   | 8.52496  | 1.97515           | 2.35E-06    | 0.000641826 | yes         |
| XLOC_000248 | XLOC_000248 | Sh3bp4        | chr1:90967036-91051626    | 3.34377   | 6.09387  | 0.865882          | 0.000303554 | 0.0364341   | yes         |
| XLOC_000315 | XLOC_000315 | C1ql2         | chr1:122237158-122239751  | 1.90134   | 0.142075 | -3.74229          | 2.55E-05    | 0.00533835  | yes         |
| XLOC_000401 | XLOC_000401 | Pdc           | chr1:152166546-152181036  | 336.018   | 130.745  | -1.36178          | 3.07E-07    | 0.000102031 | yes         |
| XLOC_000479 | XLOC_000479 | Tmco1         | chr1:169238800-169264109  | 2.4238    | 0.834135 | -1.53892          | 1.84E-06    | 0.000522797 | yes         |
| XLOC_000616 | XLOC_000616 | Mybl1         | chr1:9657469-9690295      | 10.2261   | 5.96364  | -0.777995         | 6.97E-05    | 0.0115021   | yes         |
| XLOC_000620 | XLOC_000620 | Cops5         | chr1:10014662-10027979    | 11.6754   | 22.27    | 0.931635          | 0.000105568 | 0.0160152   | yes         |
| XLOC_000766 | XLOC_000766 | Cryge         | chr1:65095130-65097737    | 2.97244   | 8.54464  | 1.52337           | 5.53E-05    | 0.00950065  | yes         |
| XLOC_000767 | XLOC_000767 | Crygd         | chr1:65108411-65110014    | 2.65765   | 20.0574  | 2.91591           | 0           | 0           | yes         |
| XLOC_000768 | XLOC_000768 | Crygc         | chr1:65118105-65120095    | 5.3951    | 59.8765  | 3.47227           | 0           | 0           | yes         |
| XLOC_000769 | XLOC_000769 | Crygb         | chr1:65126800-65128841    | 2.16495   | 6.83364  | 1.65832           | 9.64E-06    | 0.00218309  | yes         |
| XLOC_000770 | XLOC_000770 | Cryga         | chr1:65146962-65149937    | 3.00884   | 13.941   | 2.21205           | 8.80E-09    | 4.31E-06    | yes         |
| XLOC_004019 | XLOC_004019 | Fabp7         | chr10:57504686-57508328   | 148.068   | 67.1338  | -1.14115          | 7.60E-07    | 0.000234118 | yes         |
| XLOC_004176 | XLOC_004176 | Csnk1g2       | chr10:80085524-80103516   | 6.29371   | 11.7969  | 0.90642           | 0.000113276 | 0.0164191   | yes         |
| XLOC_004181 | XLOC_004181 | Oaz1          | chr10:80289400-80292035   | 197.701   | 69.9068  | -1.49982          | 1.24E-14    | 1.24E-11    | yes         |
| XLOC_004233 | XLOC_004233 | Igf1          | chr10:87321800-87399792   | 3.09336   | 0.542679 | -2.511            | 0           | 0           | yes         |
| XLOC_004276 | XLOC_004276 | Mgat4c        | chr10:101621491-101854102 | 2.20086   | 0.989623 | -1.15312          | 3.45E-05    | 0.00674562  | yes         |
| XLOC_004499 | XLOC_004499 | Rpf2          | chr10:39943051-39966845   | 7.59445   | 3.56202  | -1.09225          | 3.88E-05    | 0.00734717  | yes         |
| XLOC_004518 | XLOC_004518 | Grik2         | chr10:48819268-49508560   | 4.45764   | 1.36308  | -1.70941          | 1.44E-11    | 1.10E-08    | yes         |
| XLOC_004569 | XLOC_004569 | Arid5b        | chr10:67557119-67741474   | 0.684707  | 1.60123  | 1.22563           | 3.91E-05    | 0.00735528  | yes         |
| XLOC_004761 | XLOC_004761 | Syt1          | chr10:107934688-108447675 | 11.1413   | 4.68216  | -1.25068          | 1.40E-08    | 6.16E-06    | yes         |
| XLOC_006953 | XLOC_006953 | Hba-a1,Hba-a2 | chr11:32183671-32184493   | 11.2375   | 30.3288  | 1.43237           | 1.69E-07    | 5.73E-05    | yes         |
| XLOC_006955 | XLOC_006955 | Hba-a1,Hba-a2 | chr11:32196488-32197310   | 8.61738   | 27.3872  | 1.66818           | 9.90E-09    | 4.62E-06    | yes         |
| XLOC_007154 | XLOC_007154 | Rcvrn         | chr11:67508825-67519104   | 91.4462   | 181.966  | 0.992675          | 4.64E-05    | 0.00830738  | yes         |
| XLOC_007416 | XLOC_007416 | Col1a1        | chr11:94797583-94813915   | 0.51509   | 1.65224  | 1.68152           | 1.32E-06    | 0.000394297 | yes         |
| XLOC_007672 | XLOC_007672 | Slc16a3       | chr11:120809797-120820314 | 4.23468   | 1.74836  | -1.27625          | 5.85E-05    | 0.0099479   | yes         |
| XLOC_007723 | XLOC_007723 | H2afv         | chr11:6327228-6344446     | 10.1741   | 5.10432  | -0.995111         | 0.00011503  | 0.0164191   | yes         |
| XLOC_007929 | XLOC_007929 | Usp22         | chr11:60965282-60988561   | 4.00884   | 7.61757  | 0.926144          | 0.00034732  | 0.0403596   | yes         |
| XLOC_008021 | XLOC_008021 | C1qbp         | chr11:70783697-70796528   | 6.28034   | 15.313   | 1.28584           | 0.000111562 | 0.0164191   | yes         |
| XLOC_008088 | XLOC_008088 | Cryba1        | chr11:77532233-77538795   | 1.69668   | 6.39805  | 1.91492           | 1.27E-06    | 0.000382128 | yes         |
| XLOC_008166 | XLOC_008166 | Msi2          | chr11:88152870-88579543   | 7.72645   | 4.06381  | -0.926972         | 0.000197753 | 0.025365    | yes         |
| XLOC_008349 | XLOC_008349 | Gfap          | chr11:102748649-102758514 | 0.885967  | 4.00761  | 2.17742           | 5.77E-11    | 4.01E-08    | yes         |
| XLOC_008389 | XLOC_008389 | Cacng4        | chr11:107595172-107655804 | 4.13491   | 9.00351  | 1.12263           | 0.000108283 | 0.0161807   | yes         |
| XLOC_010475 | XLOC_010475 | Coch          | chr12:52694327-52706760   | 2.33876   | 0.483894 | -2.27298          | 9.69E-09    | 4.59E-06    | yes         |
| XLOC_010620 | XLOC_010620 | Nrxn3         | chr12:89961319-91573393   | 6.62269   | 1.53691  | -2.10738          | 0           | 0           | yes         |
| XLOC_010747 | XLOC_010747 | Eif5,Snora28  | chr12:112776311-112784964 | 407.572   | 222.538  | -0.872999         | 0.000226388 | 0.0283426   | yes         |
| XLOC_010852 | XLOC_010852 | Ifrd1         | chr12:40929696-40949776   | 35.7121   | 13.4719  | -1.40646          | 1.85E-11    | 1.35E-08    | yes         |
| XLOC_010950 | XLOC_010950 | Synj2bp       | chr12:82593180-82633894   | 2.29755   | 1.03913  | -1.14472          | 2.68E-05    | 0.0055645   | yes         |
| XLOC_011071 | XLOC_011071 | BC048943      | chr12:113209769-113307065 | 15.7175   | 5.6426   | -1.47794          | 1.33E-08    | 5.92E-06    | yes         |

|             |             |                                 |                           |          |          |           |             |             |     |
|-------------|-------------|---------------------------------|---------------------------|----------|----------|-----------|-------------|-------------|-----|
| XLOC_013336 | XLOC_013336 | Hist1h4d                        | chr13:23673470-23673782   | 7.1132   | 20.0248  | 1.49322   | 0.000243293 | 0.0301704   | yes |
| XLOC_013344 | XLOC_013344 | Hist1h1a                        | chr13:23855536-23856283   | 14.7291  | 4.56139  | -1.69112  | 1.72E-06    | 0.000498266 | yes |
| XLOC_013538 | XLOC_013538 | Fam172a                         | chr13:77847950-78305501   | 7.41279  | 4.09455  | -0.856313 | 7.16E-05    | 0.0117519   | yes |
| XLOC_013542 | XLOC_013542 | Lysmd3                          | chr13:81796804-81811859   | 9.47388  | 5.46629  | -0.793392 | 0.000137331 | 0.018741    | yes |
| XLOC_013620 | XLOC_013620 | Hcn1                            | chr13:118391126-118770590 | 4.32957  | 1.97023  | -1.13586  | 8.38E-08    | 2.98E-05    | yes |
| XLOC_013733 | XLOC_013733 | Nrsn1                           | chr13:25343907-25361865   | 0.598316 | 1.83322  | 1.6154    | 3.21E-05    | 0.0063469   | yes |
| XLOC_013769 | XLOC_013769 | Nrn1                            | chr13:36817494-36826323   | 3.22184  | 1.18594  | -1.44185  | 0.000452339 | 0.0494601   | yes |
| XLOC_013778 | XLOC_013778 | Tcfap2a                         | chr13:40808850-40829192   | 2.1952   | 4.10451  | 0.902855  | 9.99E-05    | 0.0154667   | yes |
| XLOC_013998 | XLOC_013998 | Cartpt                          | chr13:100668438-100670638 | 8.10843  | 2.32552  | -1.80187  | 0.000182879 | 0.0239716   | yes |
| XLOC_015969 | XLOC_015969 | Top2b                           | chr14:17197719-17263301   | 19.2896  | 3.46104  | -2.47854  | 0           | 0           | yes |
| XLOC_016101 | XLOC_016101 | Rpph1                           | chr14:51427121-51427446   | 0.173355 | 10.9384  | 5.97953   | 0           | 0           | yes |
| XLOC_016210 | XLOC_016210 | Ccdc25                          | chr14:66456138-66485441   | 1.30409  | 3.87844  | 1.57244   | 2.45E-06    | 0.000658622 | yes |
| XLOC_016221 | XLOC_016221 | Nefl                            | chr14:68701856-68707162   | 34.1719  | 15.6674  | -1.12504  | 5.72E-08    | 2.14E-05    | yes |
| XLOC_016302 | XLOC_016302 | Ndfip2                          | chr14:105657889-105708515 | 13.8908  | 6.45831  | -1.1049   | 1.20E-07    | 4.17E-05    | yes |
| XLOC_016332 | XLOC_016332 | Pdhh                            | chr14:8998460-9005506     | 22.5474  | 10.6669  | -1.07982  | 1.87E-06    | 0.00052811  | yes |
| XLOC_016352 | XLOC_016352 | 2700060E02Rik                   | chr14:20570478-20643045   | 5.74946  | 15.5023  | 1.43098   | 7.26E-07    | 0.000225966 | yes |
| XLOC_016540 | XLOC_016540 | Nedd8                           | chr14:56281103-56290743   | 14.5875  | 4.891    | -1.57653  | 6.01E-06    | 0.00147112  | yes |
| XLOC_016687 | XLOC_016687 | Pcdh9                           | chr14:93412919-94287951   | 2.29505  | 1.03354  | -1.15093  | 0.000115859 | 0.0164191   | yes |
| XLOC_016699 | XLOC_016699 | Ednrb                           | chr14:104213841-104243390 | 1.58477  | 3.29902  | 1.05776   | 9.66E-05    | 0.015036    | yes |
| XLOC_016725 | XLOC_016725 | Fgf14                           | chr14:124376567-125076349 | 7.15074  | 1.31559  | -2.44238  | 0           | 0           | yes |
| XLOC_018997 | XLOC_018997 | Cdh18                           | chr15:22966217-23404173   | 1.87322  | 0.628825 | -1.57479  | 4.53E-05    | 0.0081498   | yes |
| XLOC_019458 | XLOC_019458 | Ndrp1                           | chr15:66760879-66801203   | 14.2242  | 26.1703  | 0.879576  | 6.66E-07    | 0.000209398 | yes |
| XLOC_019703 | XLOC_019703 | 2310037I24Rik, Snora2b, Snora34 | chr15:98349246-98364652   | 79.4032  | 15.3275  | -2.37307  | 1.62E-11    | 1.21E-08    | yes |
| XLOC_021243 | XLOC_021243 | Rbfox1                          | chr16:5884885-7412591     | 3.26949  | 0.421798 | -2.95444  | 0           | 0           | yes |
| XLOC_021466 | XLOC_021466 | Filip1l                         | chr16:57302112-57606980   | 1.91679  | 0.463493 | -2.04807  | 1.03E-09    | 5.57E-07    | yes |
| XLOC_021491 | XLOC_021491 | Ncam2                           | chr16:81200941-81625315   | 4.11356  | 0.542625 | -2.92236  | 0           | 0           | yes |
| XLOC_021662 | XLOC_021662 | Crygs                           | chr16:22805275-22811483   | 1.39654  | 6.8887   | 2.30237   | 8.85E-06    | 0.0020345   | yes |
| XLOC_021675 | XLOC_021675 | Fgf12                           | chr16:28160183-28753288   | 6.41166  | 1.25724  | -2.35044  | 0           | 0           | yes |
| XLOC_021772 | XLOC_021772 | Alcam                           | chr16:52249108-52453110   | 2.00704  | 0.859802 | -1.22299  | 0.000107628 | 0.0161637   | yes |
| XLOC_021838 | XLOC_021838 | Robo2                           | chr16:73892550-74411820   | 5.58064  | 2.41323  | -1.20946  | 4.78E-09    | 2.46E-06    | yes |
| XLOC_021856 | XLOC_021856 | Grik1                           | chr16:87896141-88290503   | 6.06348  | 1.56785  | -1.95136  | 2.98E-14    | 2.87E-11    | yes |
| XLOC_023936 | XLOC_023936 | Cryaa                           | chr17:31814889-31818669   | 2.28771  | 7.04159  | 1.622     | 1.29E-05    | 0.00285972  | yes |
| XLOC_024276 | XLOC_024276 | Qk                              | chr17:10399335-10512226   | 9.35211  | 6.04404  | -0.629778 | 0.000351117 | 0.0403596   | yes |
| XLOC_024323 | XLOC_024323 | 3110048L19Rik, Zfp942           | chr17:22063907-22099446   | 6.48803  | 3.29319  | -0.978293 | 0.000139459 | 0.0189449   | yes |
| XLOC_024441 | XLOC_024441 | Glo1                            | chr17:30728170-30749604   | 194.61   | 107.153  | -0.860918 | 3.27E-07    | 0.000107301 | yes |
| XLOC_024660 | XLOC_024660 | Zfp119a                         | chr17:56004191-56018195   | 2.51396  | 0.9399   | -1.41939  | 8.15E-05    | 0.0131019   | yes |
| XLOC_024781 | XLOC_024781 | Nrxn1                           | chr17:90432983-91492198   | 3.1848   | 1.41004  | -1.17547  | 2.02E-06    | 0.000563503 | yes |
| XLOC_026612 | XLOC_026612 | Rps14                           | chr18:60934249-60938200   | 17.3409  | 36.2114  | 1.06226   | 0.00018529  | 0.0240764   | yes |
| XLOC_026675 | XLOC_026675 | Atp5a1                          | chr18:78012506-78021607   | 46.6339  | 28.184   | -0.726503 | 0.000216596 | 0.0274288   | yes |
| XLOC_028723 | XLOC_028723 | 5730408K05Rik                   | chr19:8962222-8963320     | 88.0195  | 46.2977  | -0.926884 | 0.000321974 | 0.0378839   | yes |
| XLOC_030185 | XLOC_030185 | Galnt13                         | chr2:54288797-54970155    | 4.29442  | 2.32523  | -0.885086 | 0.000127389 | 0.0177076   | yes |
| XLOC_030204 | XLOC_030204 | B3galt1                         | chr2:67955769-67960747    | 1.92089  | 0.786291 | -1.28864  | 4.48E-05    | 0.0081207   | yes |
| XLOC_030370 | XLOC_030370 | Celf1                           | chr2:90780614-90859670    | 7.44739  | 12.1828  | 0.710038  | 0.000307276 | 0.0365567   | yes |
| XLOC_030527 | XLOC_030527 | Eid1                            | chr2:125453182-125549884  | 31.4103  | 14.872   | -1.07864  | 8.13E-06    | 0.00188446  | yes |
| XLOC_030590 | XLOC_030590 | 6330527O06Rik                   | chr2:135883662-135895653  | 2.67245  | 6.90304  | 1.36907   | 7.17E-06    | 0.00171457  | yes |

|             |             |                     |                          |           |           |           |             |             |     |
|-------------|-------------|---------------------|--------------------------|-----------|-----------|-----------|-------------|-------------|-----|
| XLOC_030709 | XLOC_030709 | Ergic3              | chr2:155833860-155844015 | 1.06288   | 3.1588    | 1.57139   | 1.22E-05    | 0.00274531  | yes |
| XLOC_030719 | XLOC_030719 | 1110008F13Rik       | chr2:156688857-156712814 | 10.3984   | 27.6925   | 1.41314   | 3.43E-06    | 0.000876869 | yes |
| XLOC_030767 | XLOC_030767 | Pkig                | chr2:163484121-163551894 | 5.8055    | 13.1403   | 1.17851   | 0.000225737 | 0.0283426   | yes |
| XLOC_030868 | XLOC_030868 | Col9a3              | chr2:180332926-180377396 | 1895.87   | 2.26068   | -9.71189  | 0           | 0           | yes |
| XLOC_031006 | XLOC_031006 | 6530402F18Rik,Ntng2 | chr2:29050340-29108513   | 3.79531   | 7.20341   | 0.924463  | 0.000280577 | 0.0340867   | yes |
| XLOC_031081 | XLOC_031081 | Psmb7               | chr2:38443519-38499426   | 33.8819   | 16.5255   | -1.03582  | 2.29E-05    | 0.00482101  | yes |
| XLOC_031166 | XLOC_031166 | Zfp385b             | chr2:77248688-77654873   | 11.278    | 4.51492   | -1.32074  | 7.93E-09    | 3.95E-06    | yes |
| XLOC_031180 | XLOC_031180 | Zdhhc5              | chr2:84518558-84555321   | 4.62794   | 7.95134   | 0.780829  | 3.88E-05    | 0.00734717  | yes |
| XLOC_031402 | XLOC_031402 | Ano3                | chr2:110498296-110790427 | 2.04295   | 0.0638899 | -4.99892  | 5.77E-06    | 0.0014254   | yes |
| XLOC_031510 | XLOC_031510 | Ciao1               | chr2:127034139-127073552 | 5.46013   | 2.48992   | -1.13284  | 7.27E-05    | 0.0118656   | yes |
| XLOC_031573 | XLOC_031573 | Bfsp1               | chr2:143652263-143688909 | 0.325278  | 3.69969   | 3.50766   | 2.19E-10    | 1.31E-07    | yes |
| XLOC_031598 | XLOC_031598 | Vsx1                | chr2:150506439-150514873 | 1.98393   | 0.787821  | -1.33242  | 0.000105516 | 0.0160152   | yes |
| XLOC_031713 | XLOC_031713 | Elmo2               | chr2:165113530-165151979 | 5.8237    | 10.2788   | 0.819661  | 2.20E-05    | 0.00470509  | yes |
| XLOC_031770 | XLOC_031770 | Zfp931              | chr2:177801582-177813171 | 4.37908   | 1.59475   | -1.4573   | 8.10E-07    | 0.000246919 | yes |
| XLOC_034816 | XLOC_034816 | Pkia                | chr3:7366603-7445365     | 15.5117   | 7.82128   | -0.987878 | 8.32E-05    | 0.0132336   | yes |
| XLOC_034834 | XLOC_034834 | Bhlhe22             | chr3:17954324-17957514   | 4.05699   | 1.81845   | -1.1577   | 0.000150767 | 0.0202055   | yes |
| XLOC_034879 | XLOC_034879 | Ndufb5              | chr3:32635984-32650481   | 7.51257   | 2.88926   | -1.37861  | 0.000107419 | 0.0161637   | yes |
| XLOC_034885 | XLOC_034885 | Atp11b              | chr3:35653059-35755211   | 9.87969   | 6.07928   | -0.700565 | 0.000266356 | 0.0326242   | yes |
| XLOC_035015 | XLOC_035015 | Fstl5               | chr3:75878519-76513927   | 3.55721   | 1.10871   | -1.68186  | 9.27E-09    | 4.47E-06    | yes |
| XLOC_035185 | XLOC_035185 | Hist2h2bb           | chr3:96073622-96074115   | 8.85641   | 65.0429   | 2.8766    | 0           | 0           | yes |
| XLOC_035297 | XLOC_035297 | Abca4               | chr3:121747377-121882979 | 2.81705   | 9.22108   | 1.71075   | 1.78E-15    | 1.90E-12    | yes |
| XLOC_035433 | XLOC_035433 | Nlgn1               | chr3:25330748-26230831   | 5.27252   | 2.29022   | -1.20301  | 8.07E-08    | 2.94E-05    | yes |
| XLOC_035897 | XLOC_035897 | Ptbp2               | chr3:119421659-119486306 | 16.7949   | 9.77596   | -0.780714 | 5.86E-05    | 0.0099479   | yes |
| XLOC_035979 | XLOC_035979 | St6galnac5          | chr3:152482865-152645171 | 0.878689  | 2.06885   | 1.23541   | 0.000446816 | 0.0490939   | yes |
| XLOC_038231 | XLOC_038231 | Rab2a               | chr4:8462790-8534849     | 16.8126   | 7.45991   | -1.17232  | 1.74E-06    | 0.000501311 | yes |
| XLOC_038298 | XLOC_038298 | Gm3893              | chr4:41763293-42104673   | 378.788   | 0.102353  | -11.8536  | 0           | 0           | yes |
| XLOC_038708 | XLOC_038708 | Gale                | chr4:135521079-135528509 | 2.71294   | 6.73208   | 1.31119   | 6.55E-05    | 0.0110638   | yes |
| XLOC_038939 | XLOC_038939 | Ndufb6              | chr4:40217695-40226401   | 19.8916   | 7.43411   | -1.41992  | 4.16E-08    | 1.60E-05    | yes |
| XLOC_039122 | XLOC_039122 | Klhl9               | chr4:88364195-88368412   | 10.4991   | 5.24896   | -1.00016  | 8.30E-05    | 0.0132336   | yes |
| XLOC_039218 | XLOC_039218 | Rps8                | chr4:116826249-116828737 | 13.3756   | 527.669   | 5.30195   | 0           | 0           | yes |
| XLOC_039283 | XLOC_039283 | Utp11l              | chr4:124356007-124370798 | 1.15551   | 3.61183   | 1.64421   | 9.43E-05    | 0.014761    | yes |
| XLOC_039392 | XLOC_039392 | Pnrc2               | chr4:135426840-135429761 | 13.6248   | 6.45683   | -1.07733  | 5.18E-05    | 0.00901903  | yes |
| XLOC_039419 | XLOC_039419 | 2310028O11Rik       | chr4:138657728-138687028 | 3.23126   | 6.60311   | 1.03105   | 0.000114385 | 0.0164191   | yes |
| XLOC_041907 | XLOC_041907 | Nos3                | chr5:23870636-23897961   | 0.108316  | 349.327   | 11.6551   | 0           | 0           | yes |
| XLOC_042052 | XLOC_042052 | Pcdh7               | chr5:58109259-58524475   | 5.96074   | 1.87256   | -1.67048  | 0           | 0           | yes |
| XLOC_042106 | XLOC_042106 | Lphn3               | chr5:81450617-82224755   | 4.43017   | 1.90878   | -1.21472  | 8.29E-08    | 2.98E-05    | yes |
| XLOC_042184 | XLOC_042184 | Spp1                | chr5:104864136-104870069 | 0.871823  | 2.82429   | 1.69578   | 0.000178252 | 0.023468    | yes |
| XLOC_042244 | XLOC_042244 | Crybb1              | chr5:112684840-112698602 | 0.287087  | 5.41898   | 4.23846   | 4.33E-05    | 0.00798244  | yes |
| XLOC_042342 | XLOC_042342 | Arl6ip4             | chr5:124566116-124568272 | 3.91927   | 10.6993   | 1.44886   | 0.000148933 | 0.0200496   | yes |
| XLOC_042367 | XLOC_042367 | Cct6a               | chr5:130293260-130322231 | 22.1961   | 10.2509   | -1.11455  | 2.67E-07    | 8.97E-05    | yes |
| XLOC_042368 | XLOC_042368 | Snora15             | chr5:130293260-130322231 | 85.2      | 36.4386   | -1.22538  | 0.000131081 | 0.0181364   | yes |
| XLOC_042398 | XLOC_042398 | Hspb1               | chr5:136363788-136365433 | 0.0551148 | 2.4345    | 5.46504   | 0.000303557 | 0.0364341   | yes |
| XLOC_042495 | XLOC_042495 | Zfp655              | chr5:145992583-146008175 | 4.84301   | 2.64434   | -0.872997 | 0.000453459 | 0.0494601   | yes |
| XLOC_042502 | XLOC_042502 | Rpl21               | chr5:147644465-147648628 | 13.5429   | 3.19899   | -2.08185  | 5.33E-15    | 5.49E-12    | yes |
| XLOC_042531 | XLOC_042531 | Cdk14               | chr5:4803384-5380251     | 3.42617   | 1.00344   | -1.77164  | 2.58E-09    | 1.37E-06    | yes |
| XLOC_042557 | XLOC_042557 | Reln                | chr5:21390271-21850523   | 2.55382   | 1.26753   | -1.01063  | 0.000132734 | 0.0181968   | yes |

|             |             |                 |                          |          |           |           |             |             |     |
|-------------|-------------|-----------------|--------------------------|----------|-----------|-----------|-------------|-------------|-----|
| XLOC_042734 | XLOC_042734 | Epha5           | chr5:84483787-84846407   | 6.04107  | 3.44629   | -0.809759 | 8.93E-05    | 0.0140403   | yes |
| XLOC_042787 | XLOC_042787 | Paqr3           | chr5:97426707-97540615   | 3.00269  | 5.57132   | 0.891764  | 0.000360827 | 0.0413168   | yes |
| XLOC_042861 | XLOC_042861 | Cryba4          | chr5:112675552-112681522 | 0.745538 | 4.97878   | 2.73944   | 5.19E-05    | 0.00901903  | yes |
| XLOC_042878 | XLOC_042878 | Crybb3          | chr5:113504858-113510604 | 3.49751  | 51.4053   | 3.87752   | 0           | 0           | yes |
| XLOC_045476 | XLOC_045476 | Tac1            | chr6:7505070-7512973     | 3.77728  | 0.567872  | -2.73371  | 5.19E-05    | 0.00901903  | yes |
| XLOC_045534 | XLOC_045534 | Exoc4           | chr6:33199144-33923997   | 2.89735  | 1.49867   | -0.951051 | 0.000199515 | 0.0254817   | yes |
| XLOC_045653 | XLOC_045653 | Chn2            | chr6:53989925-54380215   | 1.49754  | 3.20648   | 1.0984    | 0.000226657 | 0.0283426   | yes |
| XLOC_045732 | XLOC_045732 | Lox13           | chr6:82984194-83004565   | 0.587328 | 27.5587   | 5.5522    | 0.000120186 | 0.0168633   | yes |
| XLOC_045806 | XLOC_045806 | Lsm3            | chr6:91466028-91472614   | 9.12185  | 2.07345   | -2.1373   | 3.49E-08    | 1.39E-05    | yes |
| XLOC_045832 | XLOC_045832 | Grm7            | chr6:110595591-111517224 | 2.31299  | 0.985474  | -1.23087  | 0.000115915 | 0.0164191   | yes |
| XLOC_046122 | XLOC_046122 | Opn1sw          | chr6:29298118-29330513   | 29.4668  | 11.4531   | -1.36336  | 3.16E-12    | 2.55E-09    | yes |
| XLOC_046315 | XLOC_046315 | Ptcd3           | chr6:71830559-71858756   | 6.60934  | 14.0568   | 1.08869   | 7.60E-08    | 2.80E-05    | yes |
| XLOC_046329 | XLOC_046329 | Ctnna2          | chr6:76831630-77929661   | 4.99172  | 1.3947    | -1.83958  | 1.10E-13    | 1.03E-10    | yes |
| XLOC_046522 | XLOC_046522 | Eno2            | chr6:124710072-124719527 | 2.40508  | 5.27045   | 1.13184   | 0.000215145 | 0.0273609   | yes |
| XLOC_046534 | XLOC_046534 | Ncapd2,Scarna10 | chr6:125118024-125141636 | 8769.25  | 4477.34   | -0.96981  | 0.000115227 | 0.0164191   | yes |
| XLOC_048702 | XLOC_048702 | Tmem160         | chr7:17038127-17040839   | 3.84501  | 18.1619   | 2.23986   | 9.30E-06    | 0.00212144  | yes |
| XLOC_049157 | XLOC_049157 | Dlg2            | chr7:98239295-99597599   | 2.02876  | 0.828412  | -1.29218  | 6.74E-06    | 0.00162485  | yes |
| XLOC_049324 | XLOC_049324 | Rpl27a,Snora3   | chr7:116662708-116665981 | 34.3499  | 10.6255   | -1.69277  | 3.15E-05    | 0.0063271   | yes |
| XLOC_049326 | XLOC_049326 | Ipo7,Snora23    | chr7:117161794-117198628 | 859.171  | 389.557   | -1.14111  | 3.17E-06    | 0.000831047 | yes |
| XLOC_049341 | XLOC_049341 | Spon1           | chr7:120909511-121186889 | 5.1135   | 2.03308   | -1.33065  | 3.57E-08    | 1.39E-05    | yes |
| XLOC_049947 | XLOC_049947 | Zfp536          | chr7:38263333-38554771   | 4.40645  | 2.06555   | -1.09309  | 7.93E-06    | 0.00185181  | yes |
| XLOC_050286 | XLOC_050286 | Hbb-b1,Hbb-b2   | chr7:110961037-110962437 | 25.2875  | 81.2542   | 1.68402   | 1.83E-10    | 1.11E-07    | yes |
| XLOC_050401 | XLOC_050401 | Dkk3            | chr7:119259532-119302619 | 9.79662  | 30.0155   | 1.61535   | 6.65E-11    | 4.52E-08    | yes |
| XLOC_053555 | XLOC_053555 | Spock3          | chr8:65430242-65835893   | 3.0044   | 0.712775  | -2.07556  | 8.80E-10    | 4.87E-07    | yes |
| XLOC_053557 | XLOC_053557 | Mar1            | chr8:68141938-68995877   | 11.548   | 4.99161   | -1.21007  | 2.06E-12    | 1.76E-09    | yes |
| XLOC_053586 | XLOC_053586 | Sugp2           | chr8:72744091-72787744   | 4.64866  | 7.91736   | 0.768204  | 0.00016038  | 0.0213027   | yes |
| XLOC_054012 | XLOC_054012 | Vdac3           | chr8:23687546-23704285   | 9.85211  | 4.94001   | -0.995921 | 0.000184601 | 0.0240764   | yes |
| XLOC_054236 | XLOC_054236 | Cbln1           | chr8:89992751-89996491   | 1.55687  | 3.84983   | 1.30615   | 0.000261443 | 0.0321543   | yes |
| XLOC_054280 | XLOC_054280 | Cdh8            | chr8:101552668-101940357 | 5.58495  | 1.95622   | -1.51347  | 9.81E-11    | 6.38E-08    | yes |
| XLOC_056327 | XLOC_056327 | Zfp317          | chr9:19426534-19454175   | 6.11878  | 3.15083   | -0.957511 | 0.000350787 | 0.0403596   | yes |
| XLOC_056340 | XLOC_056340 | Ubl5            | chr9:20442230-20451233   | 190.713  | 1.43022   | -7.05902  | 1.36E-06    | 0.000403859 | yes |
| XLOC_056483 | XLOC_056483 | 9030425E11Rik   | chr9:40494046-40593683   | 0.842325 | 2.22272   | 1.39988   | 2.20E-06    | 0.000608815 | yes |
| XLOC_056778 | XLOC_056778 | Rrp9            | chr9:106379639-106387746 | 4.29405  | 1.15572   | -1.89354  | 1.80E-05    | 0.00391836  | yes |
| XLOC_056917 | XLOC_056917 | Lars2           | chr9:123276057-123371782 | 13.3616  | 437.776   | 5.03403   | 0           | 0           | yes |
| XLOC_056928 | XLOC_056928 | Gria4           | chr9:4417892-4796234     | 11.7615  | 4.63912   | -1.34215  | 2.57E-12    | 2.13E-09    | yes |
| XLOC_057035 | XLOC_057035 | Ntm             | chr9:28802317-29770714   | 3.6925   | 1.42041   | -1.37829  | 3.40E-06    | 0.000876869 | yes |
| XLOC_057245 | XLOC_057245 | Lrrc49          | chr9:60435023-60535941   | 11.4579  | 18.1891   | 0.666727  | 3.00E-06    | 0.000797772 | yes |
| XLOC_059588 | XLOC_059588 | Atp6ap1         | chrX:71542435-71550060   | 38.9262  | 16.6702   | -1.22347  | 1.62E-06    | 0.000475252 | yes |
| XLOC_059679 | XLOC_059679 | Pgk1            | chrX:103382462-103399075 | 49.7948  | 23.543    | -1.0807   | 2.71E-08    | 1.09E-05    | yes |
| XLOC_059763 | XLOC_059763 | Gm5643          | chrX:138732047-138733780 | 5.27437  | 2.42478   | -1.12114  | 0.000385115 | 0.0435968   | yes |
| XLOC_059816 | XLOC_059816 | Eif1ax          | chrX:155810126-155827556 | 20.5808  | 43.1757   | 1.06892   | 3.74E-05    | 0.00715854  | yes |
| XLOC_060076 | XLOC_060076 | Haus7           | chrX:70682653-70704368   | 8.12421  | 3.7891    | -1.10037  | 0.000101796 | 0.0156818   | yes |
| XLOC_060169 | XLOC_060169 | Xist            | chrX:100626855-100680296 | 3.18168  | 5.90663   | 0.892546  | 4.10E-05    | 0.00766164  | yes |
| XLOC_061954 | XLOC_061954 | Uty             | chrY:433586-582181       | 2.12921  | 0.0316442 | -6.07223  | 0           | 0           | yes |
| XLOC_061955 | XLOC_061955 | Ddx3y           | chrY:597157-623056       | 2.49826  | 0.0582416 | -5.42273  | 0           | 0           | yes |

Table S4. Housekeeping genes (P0: 20 stable/22 detected/26 total; P6: 22 stable/23 detected/26 total).

| Stage | Gene     | P0 Ctrl FPKM | P0 cKO FPKM | Log2 (fold_change) | p_value  | q_value  | Significant |
|-------|----------|--------------|-------------|--------------------|----------|----------|-------------|
| P0    | Actb     | 175.246      | 173.991     | -0.01037           | 0.96955  | 0.983427 | no          |
|       | Alas1    | 1.38595      | 2.83665     | 1.03331            | 0.197726 | 0.27791  | no          |
|       | B2m      | 0.721091     | 2.82304     | 1.969              | 1        | 1        | no          |
|       | G6pd2    | 0.436323     | 2.35096     | 2.42978            | 0.038952 | 0.182214 | no          |
|       | Gapdh    | 11.1951      | 3.5026      | -1.67638           | 0.049072 | 0.182214 | no          |
|       | Gusb     | 2.41841      | 2.45253     | 0.020213           | 0.978918 | 0.989281 | no          |
|       | Gyk      | 4.02486      | 1.28373     | -1.6486            | 1        | 1        | no          |
|       | Hprt     | 13.71        | 29.1941     | 1.09045            | 0.017999 | 0.174373 | no          |
|       | Hsp90ab1 | 130.783      | 133.447     | 0.029093           | 0.911358 | 0.942271 | no          |
|       | Ipo8     | 6.60234      | 2.62035     | -1.33322           | 0.019114 | 0.180547 | no          |
|       | Pgk1     | 88.9821      | 89.0435     | -1.03006           | 0.996678 | 0.006261 | no          |
|       | Polr2a   | 6.75628      | 8.81992     | 0.384535           | 0.568718 | 0.666588 | no          |
|       | Rplp0    | 9.67276      | 22.3198     | 1.20633            | 0.018185 | 0.175688 | no          |
|       | Rps26    | 2.51038      | 1.61651     | -0.63502           | 0.66898  | 0.754392 | no          |
|       | Sdha     | 19.8515      | 14.9657     | -0.40758           | 0.182127 | 0.258951 | no          |
|       | Tbp      | 6.35164      | 7.32497     | 0.205694           | 0.736639 | 0.808907 | no          |
|       | Tfrc     | 5.98386      | 5.7776      | -0.0506            | 0.899075 | 0.933153 | no          |
|       | Tubb4    | 3.18916      | 0.680239    | -2.22907           | 0.030184 | 0.182214 | no          |
|       | Ubc      | 14.0113      | 20.1072     | 0.521121           | 0.155921 | 0.227574 | no          |
|       | Ywhaz    | 5.75826      | 6.8532      | 0.251144           | 0.560964 | 0.659409 | no          |
| Ppia  | 53.9452  | 4.43371      | -3.60491    | 0                  | 0        | yes      |             |
| P6    | Actb     | 41.8546      | 55.5673     | 0.408852           | 0.094526 | 0.203839 | no          |
|       | Alas1    | 1.50506      | 1.35825     | -0.14807           | 0.687129 | 1        | no          |
|       | B2m      | 2.135        | 2.00874     | -0.08795           | 0.8348   | 0.912573 | no          |
|       | G6pd2    | 0.442517     | 0.473508    | 0.097655           | 0.867894 | 1        | no          |
|       | Gapdh    | 6.8101       | 4.68121     | -0.5408            | 0.072626 | 0.171165 | no          |
|       | Gusb     | 0.815537     | 0.873509    | 0.099073           | 0.816457 | 1        | no          |
|       | Gyk      | 1.81107      | 1.49276     | -0.27886           | 0.319499 | 1        | no          |
|       | Hmbs     | 0.904035     | 1.16559     | 0.366612           | 0.396343 | 1        | no          |
|       | Hprt     | 4.0717       | 3.22069     | -0.33826           | 0.300151 | 0.46108  | no          |
|       | Hsp90ab1 | 38.2987      | 58.8721     | 0.620287           | 0.001137 | 0.092337 | no          |
|       | Ipo8     | 3.34036      | 3.18531     | -0.06857           | 0.753036 | 0.860685 | no          |
|       | Polr2a   | 3.62173      | 4.43663     | 0.292783           | 0.323634 | 0.4879   | no          |
|       | Ppia     | 24.7904      | 26.8531     | 0.115308           | 0.646713 | 0.78715  | no          |
|       | Rplp0    | 5.34251      | 4.3624      | -0.2924            | 0.364046 | 0.53226  | no          |
|       | Rps26    | 3.84568      | 2.59359     | -0.56829           | 0.260139 | 0.412813 | no          |
|       | Sdha     | 12.9557      | 10.0394     | -0.36792           | 0.112006 | 0.22756  | no          |

|  |       |         |         |          |          |          |     |
|--|-------|---------|---------|----------|----------|----------|-----|
|  | Tbp   | 4.04356 | 5.31218 | 0.393678 | 0.16498  | 0.285473 | no  |
|  | Tfrc  | 6.62483 | 5.29452 | -0.32338 | 0.135908 | 0.267996 | no  |
|  | Tubb4 | 1.37118 | 1.57486 | 0.199803 | 0.582252 | 0.734537 | no  |
|  | Ubc   | 8.47328 | 6.65959 | -0.34749 | 0.19784  | 0.331297 | no  |
|  | Ywhaz | 2.59259 | 3.15431 | 0.282932 | 0.316354 | 0.480487 | no  |
|  | Pgk1  | 49.7948 | 23.543  | -1.0807  | 2.71E-08 | 1.09E-05 | yes |
